# Supplementary material for: Preparation of Dibenzofurotropones via Pd-Catalyzed Cyclization
Source: MDPI journal article supplement (doi:10.3390/reactions5010005), 2024-01-22

# Preparation of Dibenzofurtropones *via* Pd-catalyzed cyclization

Yu-Wei Lin and Shiuh-Tzung Liu\*

Department of Chemistry, National Taiwan University, Taipei 106, Taiwan

Corresponding author. E-mail: [stliu@ntu.edu.tw](mailto:stliu@ntu.edu.tw)

## Supplementary Materials

### Contents

**Table S1** Physical and Spectral data of **2aa-2ga**

**Table S2** Physical and Spectral data of **1aa-1ga**

**Figure S1** <sup>1</sup>H NMR spectrum of compound **2aa**

**Figure S2** <sup>1</sup>H NMR spectrum of compound **2ab**

**Figure S3** <sup>1</sup>H NMR spectrum of compound **2ac**

**Figure S4** <sup>1</sup>H NMR spectrum of compound **2ad**

**Figure S5** <sup>1</sup>H NMR spectrum of compound **2ae**

**Figure S6** <sup>1</sup>H NMR spectrum of compound **2af**

**Figure S7** <sup>1</sup>H NMR spectrum of compound **2ag**

**Figure S8** <sup>1</sup>H NMR spectrum of compound **2ba**

**Figure S9** <sup>1</sup>H NMR spectrum of compound **2ca**

**Figure S10** <sup>1</sup>H NMR spectrum of compound **2da**

**Figure S11** <sup>1</sup>H NMR spectrum of compound **2ea**

**Figure S12** <sup>1</sup>H NMR spectrum of compound **2fa**

**Figure S13** <sup>1</sup>H NMR spectrum of compound **2ga**

**Figure S14** <sup>1</sup>H NMR spectrum of compound **1aa**

**Figure S15** <sup>1</sup>H NMR spectrum of compound **1ab**

**Figure S16** <sup>1</sup>H NMR spectrum of compound **1ac**

**Figure S17** <sup>1</sup>H NMR spectrum of compound **1ad**

**Figure S18** <sup>1</sup>H NMR spectrum of compound **1ae**

**Figure S19** <sup>1</sup>H NMR spectrum of compound **1af**

**Figure S20** <sup>1</sup>H NMR spectrum of compound **1da**

**Figure S21** <sup>1</sup>H NMR spectrum of compound **1ea**

**Figure S22** <sup>1</sup>H NMR spectrum of compound **1fa**

**Figure S23** <sup>1</sup>H NMR spectrum of compound **1ga**

**Table S1** Physical and spectral data of **2aa-2ga**

| compd      | structure                                                                           | Physical and spectral data                                                                                                                                                                                                                                                                                                                                                                                                                                                                                                                                                                                                                                                                                                                                                                                                                                                |
|------------|-------------------------------------------------------------------------------------|---------------------------------------------------------------------------------------------------------------------------------------------------------------------------------------------------------------------------------------------------------------------------------------------------------------------------------------------------------------------------------------------------------------------------------------------------------------------------------------------------------------------------------------------------------------------------------------------------------------------------------------------------------------------------------------------------------------------------------------------------------------------------------------------------------------------------------------------------------------------------|
| <b>2aa</b> | 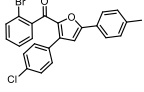   | Pale yellow solid; m.p.: 92-93 °C; Eluent: ethyl acetate : hexane = 3 : 97; (383 mg, 38%). <sup>1</sup> H NMR (400 Mz, CDCl <sub>3</sub> ) δ 7.62 (d, <i>J</i> = 8.2 Hz, 2H), 7.57 (d, <i>J</i> = 8.4 Hz, 3H), 7.48 (dd, <i>J</i> = 7.9, 1.1 Hz 1H), 7.40 (d, <i>J</i> = 7.2 Hz, 1H), 7.33-7.28 (m, 4H), 7.24 (d, <i>J</i> = 8.0Hz, 2H), 6.90 (s, 1H), 2.40 (s, 3H); <sup>13</sup> C NMR (100 MHz, CDCl <sub>3</sub> ) δ 183.2, 157.6, 145.1, 140.6, 140.0, 137.8, 134.5, 132.9, 131.2, 130.4, 130.1, 129.6, 129.5, 128.2, 127.0, 126.1, 125.1, 120.2, 109.3, 21.4. IR (KBr) ν <sub>C=O</sub> 1648 cm <sup>-1</sup> . HRMS (ESI-TOF) m/z [M+H] <sup>+</sup> Calcd. for C <sub>24</sub> H <sub>17</sub> BrClO <sub>2</sub> : 451.0095. Found: 451.0090.                                                                                                                    |
| <b>2ab</b> |    | Yellow solid; m.p.: 144-145 °C; Eluent: ethyl acetate : hexane = 3 : 97; (337 mg, 45%). <sup>1</sup> H NMR (400 MHz, CDCl <sub>3</sub> ) δ 7.64 (d, <i>J</i> = 8.2 Hz, 2H), 7.62 (d, <i>J</i> = 8.2 Hz, 2H), 7.58 (dd, <i>J</i> = 7.8, 1.1 Hz, 1H), 7.41 (dd, <i>J</i> = 7.5, 1.9 Hz, 1H), 7.32 (d, <i>J</i> = 7.4, 1.3 Hz, 1H), 7.28 (dd, <i>J</i> = 7.8, 1.9 Hz, 1H), 7.23 (d, <i>J</i> = 8.2 Hz, 2H), 6.92 (s, 1H), 6.89 (d, <i>J</i> = 8.9 Hz, 2H), 3.84 (s, 3H), 2.39 (s, 3H); <sup>13</sup> C NMR (100 MHz, CDCl <sub>3</sub> ) δ 183.1, 159.8, 157.4, 144.8, 140.9, 139.7, 138.6, 132.8, 130.9, 130.4, 129.5, 129.5, 126.9, 126.3, 125.1, 123.9, 120.1, 113.5, 109.3, 55.2, 21.4. IR (KBr) ν <sub>C=O</sub> 1645 cm <sup>-1</sup> . HRMS (ESI-TOF) m/z [M+H] <sup>+</sup> Calcd. for C <sub>25</sub> H <sub>20</sub> BrO <sub>3</sub> : 447.0596. Found: 447.0608. |
| <b>2ac</b> |  | Yellow solid; m.p.: 88-89 °C; Eluent: ethyl acetate : hexane = 3 : 97; (349 mg, 53%). <sup>1</sup> H NMR (400 MHz, CDCl <sub>3</sub> ) δ 7.63 (d, <i>J</i> = 8.2 Hz, 2H), 7.54-7.58 (m, 3H), 7.41 (dd, <i>J</i> = 7.4, 1.8Hz, 1H), 7.23-7.32 (m, 4H), 7.18 (d, <i>J</i> = 8.4 Hz, 2H), 6.93 (s, 1H), 2.41 (s, 3H), 2.38 (s, 3H); <sup>13</sup> C NMR (100 MHz, CDCl <sub>3</sub> ) δ 183.1, 157.4, 145.0, 140.8, 139.7, 138.8, 138.4, 132.8, 130.9, 129.6, 129.5, 128.9, 128.7, 126.8, 126.3, 125.1, 120.2, 109.5, 21.4, 21.2. IR (KBr) ν <sub>C=O</sub> 1648 cm <sup>-1</sup> . HRMS (ESI-TOF) m/z [M+H] <sup>+</sup> Calcd. for C <sub>25</sub> H <sub>20</sub> BrO <sub>2</sub> : 431.0647. Found: 431.0641.                                                                                                                                                           |
| <b>2ad</b> |  | Yellow solid; m.p.: 68-69 °C; Eluent: ethyl acetate : hexane = 3 : 97; (435 mg, 41%). <sup>1</sup> H NMR (400 MHz, CDCl <sub>3</sub> ) δ 7.66 (d, <i>J</i> = 8.2 Hz, 2H), 7.62-7.58 (m, 2H), 7.55 (dd, <i>J</i> = 7.7, 1.1 Hz, 1H), 7.39 (dd, <i>J</i> = 7.4, 1.9 Hz, 1H), 7.34-7.32 (m, 3H), 7.27-7.23 (m, 4H), 6.93 (s, 1H), 2.40 (s, 3H); <sup>13</sup> C NMR (100 MHz, CDCl <sub>3</sub> ) δ 183.1, 157.5, 145.1, 140.6, 139.8, 138.8, 132.8, 131.7, 131.1, 129.6, 129.0, 128.4, 128.0, 126.9, 126.2, 125.1, 120.2, 109.6, 21.4. IR (KBr) ν <sub>C=O</sub> 1648 cm <sup>-1</sup> . HRMS (ESI-TOF) m/z [M+H] <sup>+</sup> Calcd. for C <sub>24</sub> H <sub>18</sub> BrO <sub>2</sub> : 417.0490. Found: 417.0485.                                                                                                                                                     |
| <b>2ae</b> |  | Yellow solid; m.p.: 144-145 °C; Eluent: ethyl acetate : hexane = 3 : 97; (271 mg, 41%). <sup>1</sup> H NMR (400 MHz, CDCl <sub>3</sub> ) δ 8.10 (dd, <i>J</i> = 3.7, 1.1 Hz, 1H), 7.68 (dd, <i>J</i> = 7.9, 1.0 Hz, 1H), 7.56-7.52 (m, 3H), 7.47-7.42 (m, 2H), 7.37 (td, <i>J</i> = 8.0, 1.9 Hz, 1H), 7.22 (d, <i>J</i> = 8.0, 2H), 7.16 (dd, <i>J</i> = 5.1, 3.7 Hz, 1H), 7.09 (s, 1H), 2.39 (s, 3H); <sup>13</sup> C NMR (100 MHz, CDCl <sub>3</sub> ) δ 183.1, 157.1, 144.0, 140.9, 139.9, 133.2, 132.9, 131.2,                                                                                                                                                                                                                                                                                                                                                        |

|            |                                                                                     |                                                                                                                                                                                                                                                                                                                                                                                                                                                                                                                                                                                                                                                                                                                                                                                                                               |
|------------|-------------------------------------------------------------------------------------|-------------------------------------------------------------------------------------------------------------------------------------------------------------------------------------------------------------------------------------------------------------------------------------------------------------------------------------------------------------------------------------------------------------------------------------------------------------------------------------------------------------------------------------------------------------------------------------------------------------------------------------------------------------------------------------------------------------------------------------------------------------------------------------------------------------------------------|
|            |                                                                                     | 131.1, 129.7, 129.5, 129.4, 127.7, 127.6, 127.0, 126.0, 125.0, 120.1, 108.1, 21.4. IR (KBr) $\nu_{C=O}$ 1638 $\text{cm}^{-1}$ . HRMS (ESI-TOF) $m/z$ $[M+H]^+$ Calcd. for $\text{C}_{22}\text{H}_{16}\text{BrO}_2\text{S}$ : 423.0054. Found: 423.0049.                                                                                                                                                                                                                                                                                                                                                                                                                                                                                                                                                                       |
| <b>2af</b> | 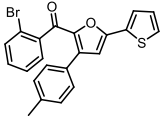   | Yellow solid; m.p.: 100-101 °C; Eluent: ethyl acetate : hexane = 3 : 97; (230 mg, 33%). $^1\text{H}$ NMR (400 MHz, $\text{CDCl}_3$ ) $\delta$ 7.55 (dd, $J$ = 7.7, 1.0 Hz, 1H), 7.52 (d, $J$ = 8.1 Hz, 2H), 7.44 (d, $J$ = 3.1 Hz, 1H), 7.40-7.37(m, 2H), 7.28 (td, $J$ = 7.3, 1.0 Hz, 1H), 7.24 (td, $J$ = 7.4, 1.8 Hz, 1H), 7.15 (d, $J$ = 8.0 Hz, 2H), 7.09 (dd, $J$ = 4.8, 3.8 Hz, 1H), 6.81 (s, 1H), 2.37 (s, 3H); $^{13}\text{C}$ NMR (100 MHz, $\text{CDCl}_3$ ) $\delta$ 182.9, 152.5, 144.7, 140.6, 138.8, 138.5, 132.8, 131.7, 131.0, 129.5, 128.9, 128.7, 128.3, 128.1, 127.2, 126.8, 125.9, 120.2, 109.8, 21.3. IR (KBr) $\nu_{C=O}$ 1644 $\text{cm}^{-1}$ . HRMS (ESI-TOF) $m/z$ $[M+H]^+$ Calcd. for $\text{C}_{22}\text{H}_{16}\text{BrO}_2\text{S}$ : 423.0052. Found: 423.0049.                              |
| <b>2ag</b> |    | Yellow solid; m.p.: 102-103 °C; Eluent: ethyl acetate : hexane = 3 : 97; (363 mg, 52%). $^1\text{H}$ NMR (400 MHz, $\text{CDCl}_3$ ) $\delta$ 7.61 (d, $J$ = 7.7 Hz, 2H), 7.56 (d, $J$ = 7.7 Hz, 1H), 7.52 (d, $J$ = 8.3 Hz, 2H), 7.46 (d, $J$ = 8.0 Hz, 2H), 7.40 (d, $J$ = 6.7 Hz, 1H), 7.31-7.20 (m, 4H), 6.89 (s, 1H), 2.38 (s, 3H); $^{13}\text{C}$ NMR (100 MHz, $\text{CDCl}_3$ ) $\delta$ 182.8, 157.4, 144.8, 140.3, 139.7, 137.1, 132.7, 131.0, 130.9, 130.5, 130.4, 129.4, 129.3, 126.8, 125.8, 124.9, 122.5, 119.9, 109.0, 21.2. IR (KBr) $\nu_{C=O}$ 1648 $\text{cm}^{-1}$ . HRMS (ESI-TOF) $m/z$ $[M+H]^+$ Calcd. for $\text{C}_{24}\text{H}_{17}\text{Br}_2\text{O}_2$ : 494.9595. Found: 494.9590.                                                                                                            |
| <b>2ba</b> |  | Pale yellow solid; m.p.: 86-87 °C; Eluent: ethyl acetate : hexane = 3 : 97; (340 mg, 32%). $^1\text{H}$ NMR (400 MHz, $\text{CDCl}_3$ ) $\delta$ 7.98 (dd, $J$ = 8.2, 1.2 Hz, 2H), 7.75 (d, $J$ = 8.2 Hz, 2H), 7.64 (dd, $J$ = 8.0, 1.1 Hz, 1H), 7.51 (tt, $J$ = 5.6, 1.3 Hz, 1H), 7.41 (t, $J$ = 7.7, 2H), 7.33 (dd, $J$ = 7.6, 1.8 Hz, 1H), 7.31-7.29 (m, 1H), 7.29-7.26 (m, 2H), 7.19 (td, $J$ = 7.9, 1.8 Hz, 1H), 6.91 (s, 1H), 2.44 (s, 3H); $^{13}\text{C}$ NMR (100 MHz, $\text{CDCl}_3$ ) $\delta$ 182.7, 156.1, 146.7, 139.4, 137.5, 136.0, 134.1, 132.6, 132.0, 131.4, 129.6, 129.5, 129.4, 127.9, 126.9, 126.5, 124.9, 123.0, 109.9, 21.4. IR (KBr) $\nu_{C=O}$ 1727 $\text{cm}^{-1}$ . HRMS (ESI-TOF) $m/z$ $[M+H]^+$ Calcd. for $\text{C}_{24}\text{H}_{18}\text{BrO}_2$ : 417.0490. Found: 417.0485.            |
| <b>2ca</b> |  | Orange solid; m.p.: 103-104 °C; Eluent: ethyl acetate : hexane = 3 : 97; (112 mg, 41%). $^1\text{H}$ NMR (400 MHz, $\text{CDCl}_3$ ) $\delta$ 7.73 (d, $J$ = 8.2 Hz, 2H), 7.51 (dd, $J$ = 7.9, 1.2 Hz, 1H), 7.44 (dd, $J$ = 7.6, 1.7 Hz, 1H), 7.37 (dd, $J$ = 7.6, 2.0 Hz, 1H), 7.30-7.26 (m, 3H), 7.15 (tt, $J$ = 7.4, 1.3 Hz, 2H), 7.12 (dd, $J$ = 7.9, 1.1 Hz, 1H), 7.08 (td, $J$ = 6.1, 1.8 Hz, 1H), 6.85 (s, 1H), 2.42 (s, 3H); $^{13}\text{C}$ NMR (100 MHz, $\text{CDCl}_3$ ) $\delta$ 182.4, 157.5, 145.9, 139.9, 139.8, 137.2, 133.3, 1332.6, 132.4, 131.2, 131.0, 129.6, 129.5, 129.1, 126.7, 126.6, 126.2, 125.2, 122.9, 120.1, 110.3, 21.4. IR (KBr) $\nu_{C=O}$ 1708 $\text{cm}^{-1}$ . HRMS (ESI-TOF) $m/z$ $[M+H]^+$ Calcd. for $\text{C}_{24}\text{H}_{17}\text{Br}_2\text{O}_2$ : 494.9595. Found: 494.9590. |

|            |                                                                                     |                                                                                                                                                                                                                                                                                                                                                                                                                                                                                                                                                                                                                                                                                                                                                                                                                                                                                                                                                       |
|------------|-------------------------------------------------------------------------------------|-------------------------------------------------------------------------------------------------------------------------------------------------------------------------------------------------------------------------------------------------------------------------------------------------------------------------------------------------------------------------------------------------------------------------------------------------------------------------------------------------------------------------------------------------------------------------------------------------------------------------------------------------------------------------------------------------------------------------------------------------------------------------------------------------------------------------------------------------------------------------------------------------------------------------------------------------------|
| <b>2da</b> | 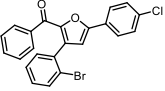   | <p>Pale yellow solid; m.p.: 120-121 °C; Eluent: ethyl acetate : hexane = 3 : 97; (131 mg, 42%). <sup>1</sup>H NMR (400 MHz, CDCl<sub>3</sub>) δ 7.93 (dd, <i>J</i> = 8.5, 1.5 Hz, 2H), 7.77 (d, <i>J</i> = 8.7, 2H), 7.63 (dd, <i>J</i> = 8.0, 1.1 Hz, 1H), 7.50 (tt, <i>J</i> = 7.5, 1.3 Hz, 1H), 7.45 (d, <i>J</i> = 8.7, 2H), 7.39 (t, <i>J</i> = 8.0 Hz, 2H), 7.30 (d, <i>J</i> = 7.5 Hz, 1H), 7.23 (td, <i>J</i> = 7.3, 1.2 Hz, 1H), 7.18 (td, <i>J</i> = 8.0, 2.0 Hz, 1H), 6.94 (s, 1H); <sup>13</sup>C NMR (100 MHz, CDCl<sub>3</sub>) δ 182.8, 154.6, 147.1, 137.3, 135.7, 135.1, 133.8, 132.7, 132.2, 131.5, 129.6, 129.4, 129.2, 128.0, 127.7, 127.0, 126.2, 123.0, 110.8. IR (KBr) ν<sub>C=O</sub> 1730 cm<sup>-1</sup>. HRMS (ESI-TOF) <i>m/z</i> [M+H]<sup>+</sup> Calcd. for C<sub>23</sub>H<sub>15</sub>BrClO<sub>2</sub>: 436.9943. Found: 436.9938.</p>                                                                              |
| <b>2ea</b> |    | <p>Pale yellow solid; m.p.: 126-127 °C; Eluent: ethyl acetate : hexane = 3 : 97; (633 mg, 70%). <sup>1</sup>H NMR (400 MHz, CDCl<sub>3</sub>) δ 7.96 (d, <i>J</i> = 7.1 Hz, 2H), 7.79 (d, <i>J</i> = 8.8 Hz, 2H), 7.63 (dd, <i>J</i> = 8.0, 1.1 Hz, 1H), 7.49 (tt, <i>J</i> = 6.6, 1.3 Hz, 1H), 7.39 (t, <i>J</i> = 7.7 Hz, 2H), 7.32 (dd, <i>J</i> = 7.6, 1.8 Hz, 1H), 7.26 (dd, <i>J</i> = 7.4, 1.3 Hz, 1H), 7.18 (dd, <i>J</i> = 7.4, 1.9 Hz, 1H), 7.01 (d, <i>J</i> = 8.9 Hz, 2H), 6.82 (s, 1H), 3.87 (s, 3H); <sup>13</sup>C NMR (100 MHz, CDCl<sub>3</sub>) δ 182.6, 160.5, 156.1, 146.5, 137.6, 136.2, 134.2, 132.7, 132.0, 131.5, 129.4, 127.9, 126.9, 126.6, 123.1, 122.0, 114.4, 109.2, 55.3. IR (KBr) ν<sub>C=O</sub> 1644 cm<sup>-1</sup>. HRMS (ESI-TOF) <i>m/z</i> [M+H]<sup>+</sup> Calcd. for C<sub>24</sub>H<sub>18</sub>BrO<sub>3</sub>: 433.0442. Found: 433.0434.</p>                                                             |
| <b>2fa</b> |  | <p>Pale yellow solid; m.p.: 98-99 °C; Eluent: ethyl acetate : hexane = 3 : 97; (116 mg, 50%). <sup>1</sup>H NMR (400 MHz, CDCl<sub>3</sub>) δ 7.73 (d, <i>J</i> = 8.1 Hz, 1H), 7.54 (dd, <i>J</i> = 7.9, 0.5 Hz, 1H), 7.40 (d, <i>J</i> = 7.6 Hz, 1H), 7.27 (d, <i>J</i> = 8.4 Hz, 1H), 7.23-7.21 (m, 1H), 7.19-7.17 (m, 2H), 7.15-7.10 (m, 2H), 7.02 (t, <i>J</i> = 7.7 Hz, 1H), 6.85 (s, 1H), 2.45 (s, 3H), 2.42 (s, 3H); <sup>13</sup>C NMR (100 MHz, CDCl<sub>3</sub>) δ 185.2, 156.7, 147.0, 139.6, 137.7, 136.9, 136.1, 133.9, 132.5, 131.3, 130.5, 130.2, 129.6, 129.3, 128.6, 126.7, 126.4, 125.1, 124.7, 123.0, 110.0, 21.4, 19.8. IR (KBr) ν<sub>C=O</sub> 1644 cm<sup>-1</sup>. HRMS (ESI-TOF) <i>m/z</i> [M+H]<sup>+</sup> Calcd. for C<sub>25</sub>H<sub>20</sub>BrO<sub>2</sub>: 431.0620. Found: 431.0641.</p>                                                                                                                         |
| <b>2ga</b> |  | <p>Pale yellow solid; m.p.: 102-103 °C; Eluent: ethyl acetate : hexane = 3 : 97; (284 mg, 58%). <sup>1</sup>H NMR (400 MHz, CDCl<sub>3</sub>) δ 7.78 (d, <i>J</i> = 8.3 Hz, 1H), 7.75 (d, <i>J</i> = 8.0 Hz, 2H), 7.70 (d, <i>J</i> = 9.5 Hz, 1H), 7.65 (d, <i>J</i> = 8.0 Hz, 1H), 7.41-7.37 (m, 1H), 7.35-7.28 (m, 4H), 7.23-7.18 (m, 2H), 6.90 (s, 1H), 2.43 (s, 3H); <sup>13</sup>C NMR (100 MHz, CDCl<sub>3</sub>) δ 180.9, 162.2 (d, <i>J</i><sub>C-F</sub> = 247.0 Hz), 156.5, 146.3, 139.7, 139.4 (d, <i>J</i><sub>C-F</sub> = 6.5 Hz), 136.6, 133.9, 132.7, 131.3, 129.6 (d, <i>J</i><sub>C-F</sub> = 10.8 Hz), 127.0, 126.2, 125.2, 125.0, 123.0, 118.9 (d, <i>J</i><sub>C-F</sub> = 21.4 Hz), 116.2 (d, <i>J</i><sub>C-F</sub> = 22.9 Hz), 110.0, 21.4. IR (KBr) ν<sub>C=O</sub> 1642 cm<sup>-1</sup>. HRMS (ESI-TOF) <i>m/z</i> [M+H]<sup>+</sup> Calcd. for C<sub>24</sub>H<sub>17</sub>BrFO<sub>2</sub>: 435.0378. Found: 435.0390.</p> |

**Table S2.** Physical and spectral data of tropones **1aa-1ga**

| compd      | structure                                                                           | Physical and spectral data                                                                                                                                                                                                                                                                                                                                                                                                                                                                                                                                                                                                                                                                                                                                                                                                                                                                                |
|------------|-------------------------------------------------------------------------------------|-----------------------------------------------------------------------------------------------------------------------------------------------------------------------------------------------------------------------------------------------------------------------------------------------------------------------------------------------------------------------------------------------------------------------------------------------------------------------------------------------------------------------------------------------------------------------------------------------------------------------------------------------------------------------------------------------------------------------------------------------------------------------------------------------------------------------------------------------------------------------------------------------------------|
| <b>1aa</b> | 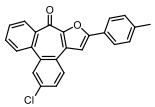   | Pale yellow solid; m.p.: 194-195 °C; Eluent: ethyl acetate : hexane = 5 : 95; (65.9 mg, 89%). <sup>1</sup> H NMR (400 MHz, (CDCl <sub>3</sub> )): δ 8.42 (dd, <i>J</i> = 7.7, 1.7 Hz, 1H), 7.93 (d, <i>J</i> = 8.0 Hz, 1H), 7.90 (s, 1H), 7.81 (t, <i>J</i> = 8.1 Hz, 3H), 7.72 (td, <i>J</i> = 7.3, 1.1 Hz, 1H), 7.66 (t, <i>J</i> = 7.0 Hz, 1H), 7.53 (dd, <i>J</i> = 8.5, 1.8 Hz, 1H), 7.28 (s, 1H), 7.27 (s, 1H), 7.20 (s, 1H), 2.41(s,3H); <sup>13</sup> C NMR (100 MHz, CDCl <sub>3</sub> ) δ 178.6, 158.1, 149.3, 139.9, 138.4, 138.0, 136.1, 133.9, 132.0, 131.8, 131.6, 131.4, 129.6, 129.5, 129.2, 128.8, 128.6, 126.8, 126.1, 125.3, 104.0, 21.4. IR (KBr) ν <sub>C=O</sub> 1628 cm <sup>-1</sup> . HRMS (ESI-TOF) m/z [M+H] <sup>+</sup> Calcd. for C <sub>24</sub> H <sub>16</sub> ClO <sub>2</sub> : 371.0833. Found: 371.0823.                                                             |
| <b>1ab</b> |    | Pale yellow solid; m.p.: 170-171 °C; Eluent: ethyl acetate : hexane = 5 : 95; (60.2 mg, 83%). <sup>1</sup> H NMR (400 MHz, (CDCl <sub>3</sub> )): δ 8.43 (d, <i>J</i> = 7.5 Hz, 1H), 7.91 (d, <i>J</i> = 6.5 Hz, 1H), 7.74 (m, 3H), 7.66 (t, <i>J</i> = 7.1 Hz, 1H), 7.61 (t, <i>J</i> = 7.4 Hz, 1H), 7.33 (s, 1H), 7.22 (d, <i>J</i> = 7.4 Hz, 2H), 7.12 (d, <i>J</i> = 3.5 Hz, 1H), 7.05 (s, 1H), 3.87 (s, 3H), 2.38 (s, 3H); <sup>13</sup> C NMR (100 MHz, CDCl <sub>3</sub> ) δ 178.5, 158.9, 157.7, 148.5, 139.5, 138.1, 137.9, 137.1, 132.9, 131.4, 131.3, 129.4, 129.3, 129.3, 128.2, 126.2, 125.2, 121.4, 117.0, 114.7, 104.0, 55.3, 21.3. IR (KBr) ν <sub>C=O</sub> 1610 cm <sup>-1</sup> . HRMS (ESI-TOF) m/z [M+H] <sup>+</sup> Calcd. for C <sub>25</sub> H <sub>19</sub> O <sub>3</sub> : 367.1329. Found: 367.1322.                                                                         |
| <b>1ac</b> |  | Pale yellow solid; m.p.: 178-179 °C; Eluent: ethyl acetate : hexane = 5 : 95; (58.3 mg, 83%). <sup>1</sup> H NMR (400 MHz, (CDCl <sub>3</sub> )): δ 8.43 (dd, <i>J</i> = 7.9, 1.6 Hz, 1H), 7.97 (d, <i>J</i> = 8.0 Hz, 1H), 7.78 (d, <i>J</i> = 8.0 Hz, 1H), 7.72 (s, 1H), 7.69 (td, <i>J</i> = 7.6, 1.8 Hz, 1H), 7.62 (td, <i>J</i> = 7.2, 1.2 Hz, 1H), 7.38 (d, <i>J</i> = 8.0 Hz, 1H), 7.27 (d, <i>J</i> = 8.0 Hz, 1H), 7.23 (s, 1H), 2.50 (s, 3H), 2.41 (s, 3H); <sup>13</sup> C NMR (100 MHz, CDCl <sub>3</sub> ) δ 178.9, 157.8, 149.1, 139.7, 138.3, 138.1, 137.5, 136.3, 132.9, 132.8, 131.5, 131.3, 129.5, 129.3, 128.1, 127.7, 126.3, 125.6, 125.3, 104.1, 21.4. IR (KBr) ν <sub>C=O</sub> 1624 cm <sup>-1</sup> . HRMS (ESI-TOF) m/z [M+H] <sup>+</sup> Calcd. for C <sub>25</sub> H <sub>19</sub> O <sub>2</sub> : 351.1380. Found: 351.1375.                                                 |
| <b>1ad</b> |  | Pale yellow solid; m.p.: 119-120 °C; Eluent: ethyl acetate : hexane = 5 : 95; (57.1 mg, 85%). <sup>1</sup> H NMR (400 MHz, (CDCl <sub>3</sub> )): δ 8.41 (dd, <i>J</i> = 7.8, 1.5 Hz, 1H), 7.97 (d, <i>J</i> = 7.9, 1.1 Hz, 1H), 7.92 (t, <i>J</i> = 9.4, 1.6 Hz, 2H), 7.81 (d, <i>J</i> = 8.1 Hz, 2H), 7.68 (td, <i>J</i> = 7.2, 1.6 Hz, 1H), 7.62 (td, <i>J</i> = 7.9, 1.6 Hz, 1H), 7.57 (td, <i>J</i> = 7.4, 1.5 Hz, 1H), 7.52 (td, <i>J</i> = 7.9, 1.8 Hz, 1H), 7.27 (s, 1H), 7.26 (s, 1H), 7.25 (s, 1H), 2.40 (s, 3H); <sup>13</sup> C NMR (100 MHz, CDCl <sub>3</sub> ) δ 179.0, 157.9, 149.4, 139.7, 138.3, 137.4, 136.4, 132.7, 132.3, 131.6, 131.4, 129.5, 129.3, 128.5, 128.2, 127.7, 126.2, 125.3, 104.1, 21.4. IR (KBr) ν <sub>C=O</sub> 1627 cm <sup>-1</sup> . HRMS (ESI-TOF) m/z [M+H] <sup>+</sup> Calcd. for C <sub>24</sub> H <sub>17</sub> O <sub>2</sub> : 337.1223. Found: 337.1230. |
| <b>1ae</b> |  | Pale yellow solid; m.p.: 161-162 °C; Eluent: ethyl acetate : hexane = 5 : 95; (50.1 mg, 73%). <sup>1</sup> H NMR (400 MHz, (CDCl <sub>3</sub> )): δ 8.88 (dd, <i>J</i> = 8.1, 1.1 Hz, 1H), 8.25 (d, <i>J</i> = 8.1 Hz, 1H), 7.87 (m, 3H), 7.75 (t, <i>J</i> = 7.5 Hz, 1H), 7.65 (t, <i>J</i> = 8.0 Hz, 1H), 7.52                                                                                                                                                                                                                                                                                                                                                                                                                                                                                                                                                                                          |

|            |                                                                                     |                                                                                                                                                                                                                                                                                                                                                                                                                                                                                                                                                                                                                                                                                                                                                                                                                                                                   |
|------------|-------------------------------------------------------------------------------------|-------------------------------------------------------------------------------------------------------------------------------------------------------------------------------------------------------------------------------------------------------------------------------------------------------------------------------------------------------------------------------------------------------------------------------------------------------------------------------------------------------------------------------------------------------------------------------------------------------------------------------------------------------------------------------------------------------------------------------------------------------------------------------------------------------------------------------------------------------------------|
|            |                                                                                     | (d, $J = 5.4$ Hz, 1H), 7.30 (s, 1H), 7.28 (s, 1H), 7.09 (s, 1H), 2.42 (s, 3H); $^{13}\text{C}$ NMR (100 MHz, $\text{CDCl}_3$ ) $\delta$ 175.4, 159.2, 147.8, 140.2, 137.7, 135.5, 132.7, 132.0, 131.6, 131.5, 129.6, 129.4, 129.3, 128.6, 128.1, 125.9, 125.6, 125.2, 103.8, 21.6. IR (KBr) $\nu_{\text{C=O}}$ 1609 $\text{cm}^{-1}$ . HRMS (ESI-TOF) $m/z$ $[\text{M}+\text{H}]^+$ Calcd. for $\text{C}_{22}\text{H}_{15}\text{O}_2\text{S}$ : 343.0787. Found: 343.0788.                                                                                                                                                                                                                                                                                                                                                                                        |
| <b>1af</b> | 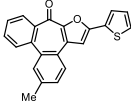   | Pale yellow solid; m.p.: 75-76 °C; Eluent: ethyl acetate : hexane = 5 : 95; (53.8 mg, 79%). $^1\text{H}$ NMR (400 MHz, $\text{CDCl}_3$ ): $\delta$ 8.41 (dd, $J = 7.8, 1.6$ Hz, 1H), 7.99 (dd, $J = 8.0, 0.9$ Hz, 1H), 7.76 (d, $J = 8.0$ Hz, 1H), 7.72 (s, 1H), 7.69 (td, $J = 7.2, 1.6$ Hz, 1H), 7.62 (m, 2H), 7.41 (dd, $J = 5.0, 1.1$ Hz, 1H), 7.38 (dd, $J = 8.0, 1.1$ Hz, 1H), 7.13 (t, $J = 3.7$ Hz, 1H), 7.12 (s, 1H), 2.51 (s, 3H); $^{13}\text{C}$ NMR (100 MHz, $\text{CDCl}_3$ ) $\delta$ 178.7, 153.0, 138.3, 137.4, 136.4, 132.8, 131.7, 131.5, 131.3, 129.5, 129.3, 128.1, 128.0, 127.7, 127.1, 126.1, 125.3, 104.6, 21.4. IR (KBr) $\nu_{\text{C=O}}$ 1622 $\text{cm}^{-1}$ . HRMS (ESI-TOF) $m/z$ $[\text{M}+\text{H}]^+$ Calcd. for $\text{C}_{22}\text{H}_{15}\text{O}_2\text{S}$ : 343.0787. Found: 343.0790.                                 |
| <b>1da</b> |    | Pale yellow solid; m.p.: 200-201 °C; Eluent: ethyl acetate : hexane = 5 : 95; (53.1 mg, 74%). $^1\text{H}$ NMR (400 MHz, $\text{CDCl}_3$ ): $\delta$ 8.42 (dd, $J = 7.9, 1.6$ Hz, 1H), 8.00 (d, $J = 8.0, 1\text{H}$ ), 7.97 (dd, $J = 8.0, 1.7$ Hz, 1H), 7.94 (tt, $J = 7.7, 1.7$ Hz, 1H), 7.88 (d, $J = 8.7$ Hz, 2H), 7.73 (td, $J = 7.3, 1.7$ Hz, 1H), 7.66 (d, $J = 7.8, 1.2$ Hz, 1H), 7.56-7.62 (m, 2H), 7.47 (d, $J = 8.7$ Hz, 2H), 7.34 (s, 1H); $^{13}\text{C}$ NMR (100 MHz, $\text{CDCl}_3$ ) $\delta$ 179.1, 156.3, 149.7, 138.2, 137.4, 136.4, 135.4, 132.4, 131.6, 131.5, 129.2, 129.1, 128.5, 128.3, 128.2, 127.8, 127.6, 127.4, 126.5, 125.3, 105.1. IR (KBr) $\nu_{\text{C=O}}$ 1628 $\text{cm}^{-1}$ . HRMS (ESI-TOF) $m/z$ $[\text{M}+\text{H}]^+$ Calcd. for $\text{C}_{23}\text{H}_{14}\text{ClO}_2$ : 357.0677. Found: 357.0679.             |
| <b>1ea</b> |  | Pale yellow solid; m.p.: 122-123 °C; Eluent: ethyl acetate : hexane = 5 : 95; (63.4 mg, 90%). $^1\text{H}$ NMR (400 MHz, $\text{CDCl}_3$ ): $\delta$ 8.43 (dd, $J = 7.8, 1.6$ Hz, 1H), 7.96 (dd, $J = 7.9, 0.6$ Hz, 1H), 7.91 (dd, $J = 7.8, 1.1$ Hz, 1H), 7.89-7.84 (m, 3H), 7.68 (td, $J = 7.2, 1.7$ Hz, 1H), 7.62 (dd, $J = 7.8, 1.3$ Hz, 1H), 7.55 (dd, $J = 7.4, 1.5$ Hz, 1H), 7.51 (dd, $J = 7.4, 1.5$ Hz, 1H), 7.17 (s, 1H), 6.97 (d, $J = 8.9$ Hz, 2H), 3.86 (s, 3H); $^{13}\text{C}$ NMR (100 MHz, $\text{CDCl}_3$ ) $\delta$ 178.7, 160.7, 157.8, 149.2, 138.2, 137.4, 136.4, 132.9, 132.3, 131.5, 131.3, 129.2, 128.4, 128.1, 127.7, 126.9, 121.7, 114.3, 103.3, 55.3. IR (KBr) $\nu_{\text{C=O}}$ 1625 $\text{cm}^{-1}$ . HRMS (ESI-TOF) $m/z$ $[\text{M}+\text{H}]^+$ Calcd. for $\text{C}_{24}\text{H}_{17}\text{O}_3$ : 353.1172. Found: 353.1165. |
| <b>1fa</b> |  | Pale yellow solid; m.p.: 158-159 °C; Eluent: ethyl acetate : hexane = 5 : 95; (59.0 mg, 84%). $^1\text{H}$ NMR (400 MHz, $\text{CDCl}_3$ ) $\delta$ 7.83 (d, $J = 7.9$ Hz, 1H), 7.80-7.75 (m, 3H), 7.68 (d, $J = 7.6$ Hz, 1H), 7.55-7.51 (m, 1H), 7.49-7.43 (m, 3H), 7.27 (d, $J = 7.9$ Hz, 2H), 7.15 (s, 1H), 2.77 (s, 3H), 2.41 (s, 3H); $^{13}\text{C}$ NMR (100 MHz, $\text{CDCl}_3$ ) $\delta$ 181.7, 155.9, 150.0, 138.2, 137.3, 137.0, 136.0, 131.4, 130.5, 129.3, 128.8, 128.4, 127.2, 126.5, 125.8, 125.5, 124.0, 102.2, 21.5, 20.3. IR (KBr) $\nu_{\text{C=O}}$ 1645 $\text{cm}^{-1}$ . HRMS (ESI-TOF) $m/z$ $[\text{M}+\text{H}]^+$ Calcd. for $\text{C}_{25}\text{H}_{19}\text{O}_2$ : 351.1380. Found: 351.1378.                                                                                                                                     |

|            |                                                                                   |                                                                                                                                                                                                                                                                                                                                                                                                                                                                                                                                                                                                                                                                                                                                                                                                                                                                         |
|------------|-----------------------------------------------------------------------------------|-------------------------------------------------------------------------------------------------------------------------------------------------------------------------------------------------------------------------------------------------------------------------------------------------------------------------------------------------------------------------------------------------------------------------------------------------------------------------------------------------------------------------------------------------------------------------------------------------------------------------------------------------------------------------------------------------------------------------------------------------------------------------------------------------------------------------------------------------------------------------|
| <b>1ga</b> | 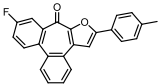 | <p>Pale yellow solid; m.p.: 148 -149 °C; Eluent: ethyl acetate : hexane = 5 : 95; (24.1 mg, 35%). <sup>1</sup>H NMR (400 MHz, (CDCl<sub>3</sub>) δ 8.13 (d, J = 7.9 Hz, 1H), 7.96 (t, J = 8.0 Hz, 1H), 7.89 (d, J = 7.7 Hz, 1H), 7.83 (d, J = 8.2 Hz, 2H), 7.61-7.54 (m, 2H), 7.50-7.43 (m, 2H), 7.29 (d, J = 7.4 Hz, 2H), 7.25 (s, 1H), 2.43 (s, 3H); <sup>13</sup>C NMR (100 MHz, CDCl<sub>3</sub>) δ 178.2, 160.4 (d, J<sub>C-F</sub> = 250.1 Hz), 158.1, 149.3, 141.4, 139.8, 134.0, 133.9 (d, J<sub>C-F</sub> = 11.6 Hz), 129.5, 129.2, 129.1, 128.9, 128.6, 127.8, 126.8, 126.1, 125.8 (d, J<sub>C-F</sub> = 10.5 Hz), 125.2, 124.8, 119.5 (d, J<sub>C-F</sub> = 26.1 Hz), 104.1, 21.3. IR (KBr) ν<sub>C=O</sub> 1636 cm<sup>-1</sup>. HRMS (ESI-TOF) m/z [M+H]<sup>+</sup> Calcd. for C<sub>24</sub>H<sub>16</sub>FO<sub>2</sub>: 355.1129. Found: 355.1123.</p> |
|------------|-----------------------------------------------------------------------------------|-------------------------------------------------------------------------------------------------------------------------------------------------------------------------------------------------------------------------------------------------------------------------------------------------------------------------------------------------------------------------------------------------------------------------------------------------------------------------------------------------------------------------------------------------------------------------------------------------------------------------------------------------------------------------------------------------------------------------------------------------------------------------------------------------------------------------------------------------------------------------|

**Figure S1**  $^1\text{H}$  NMR spectrum of compound **2aa** (400 MHz,  $\text{CDCl}_3$ )

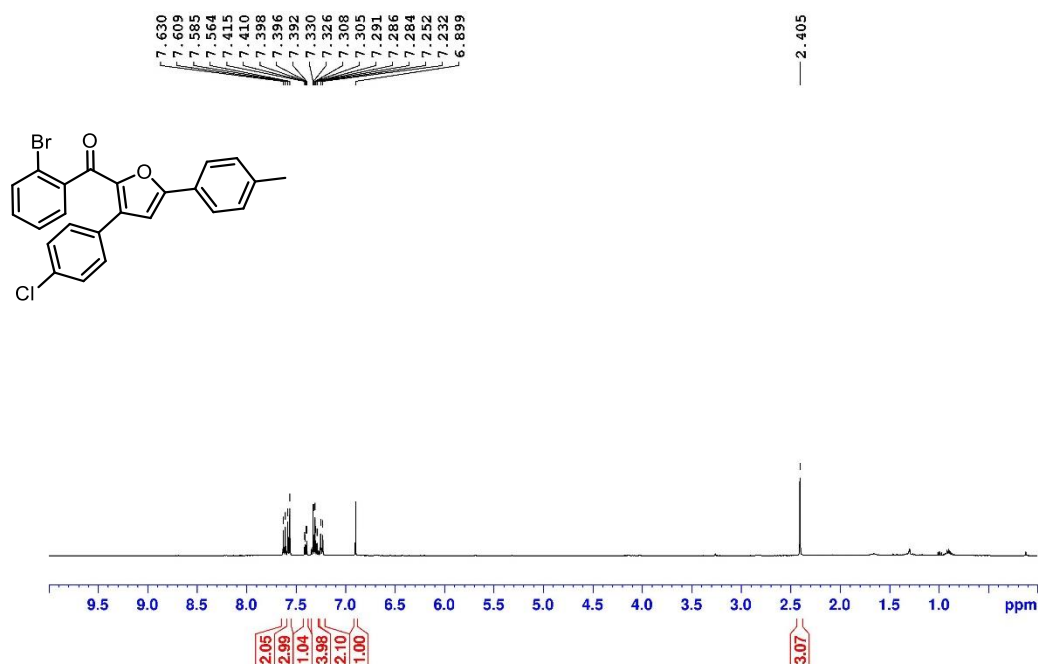

$^{13}\text{C}$  NMR spectrum of compound **2aa** (100 MHz,  $\text{CDCl}_3$ )

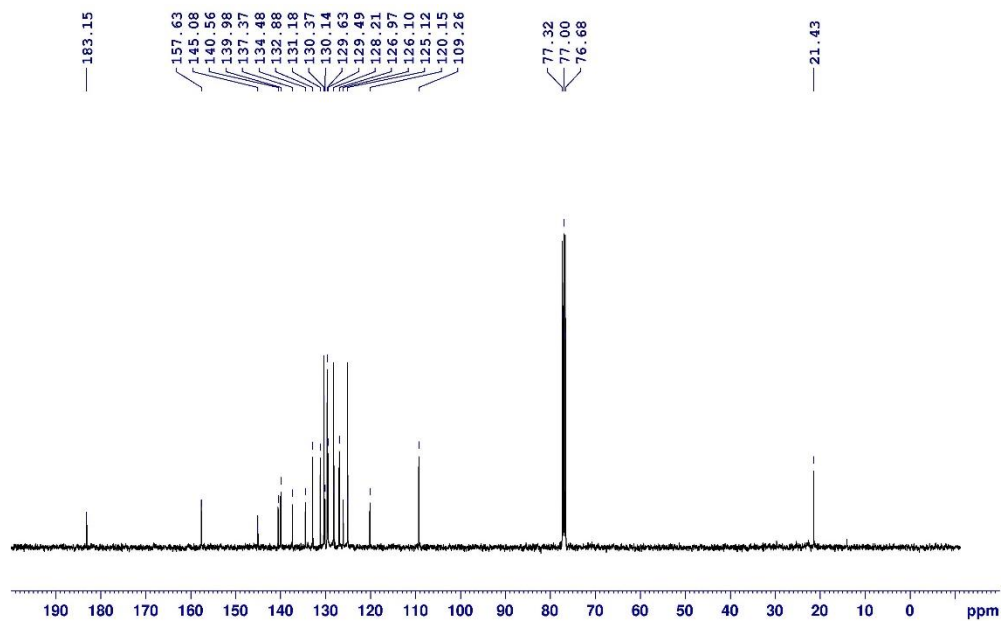



**Figure S2**  $^1\text{H}$  NMR spectrum of compound **2ab** (400 MHz,  $\text{CDCl}_3$ )

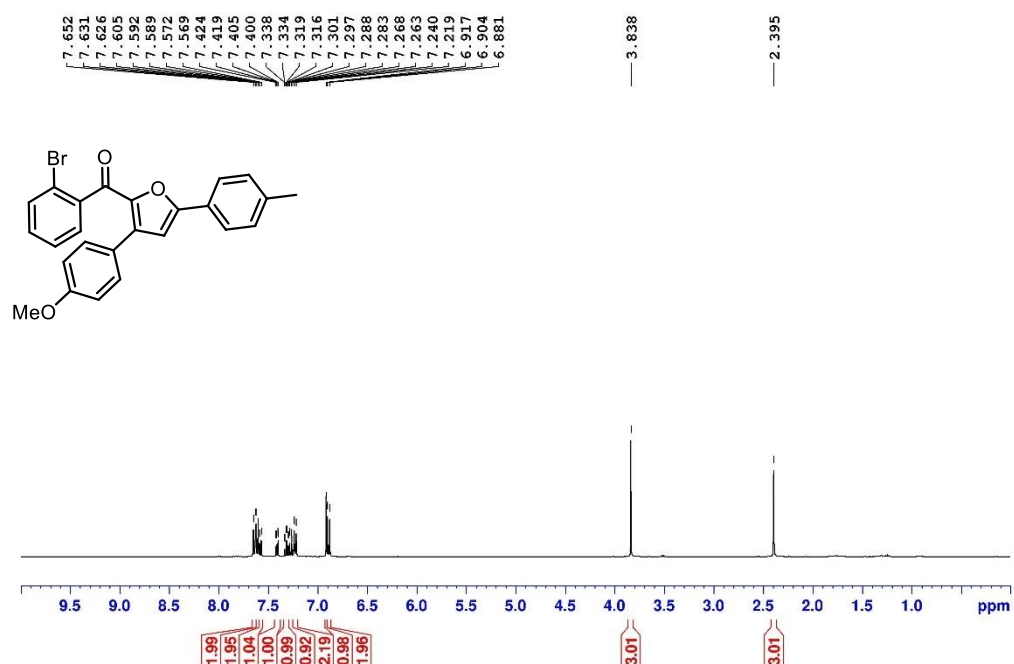

$^{13}\text{C}$  NMR spectrum of compound **2ab** (100 MHz,  $\text{CDCl}_3$ )

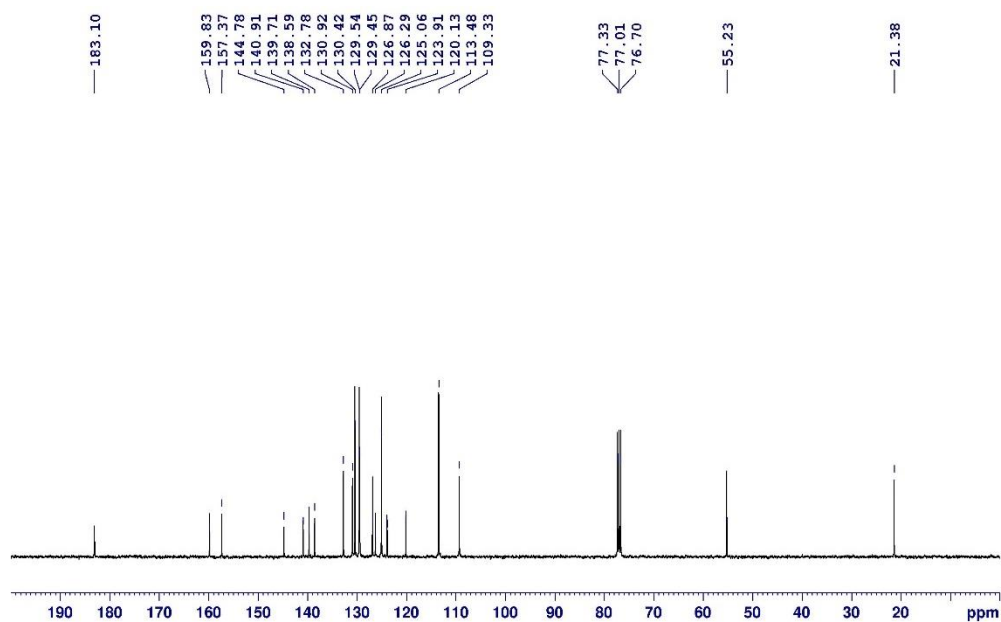

**Figure S3**  $^1\text{H}$  NMR spectrum of compound **2ac** (400 MHz,  $\text{CDCl}_3$ )

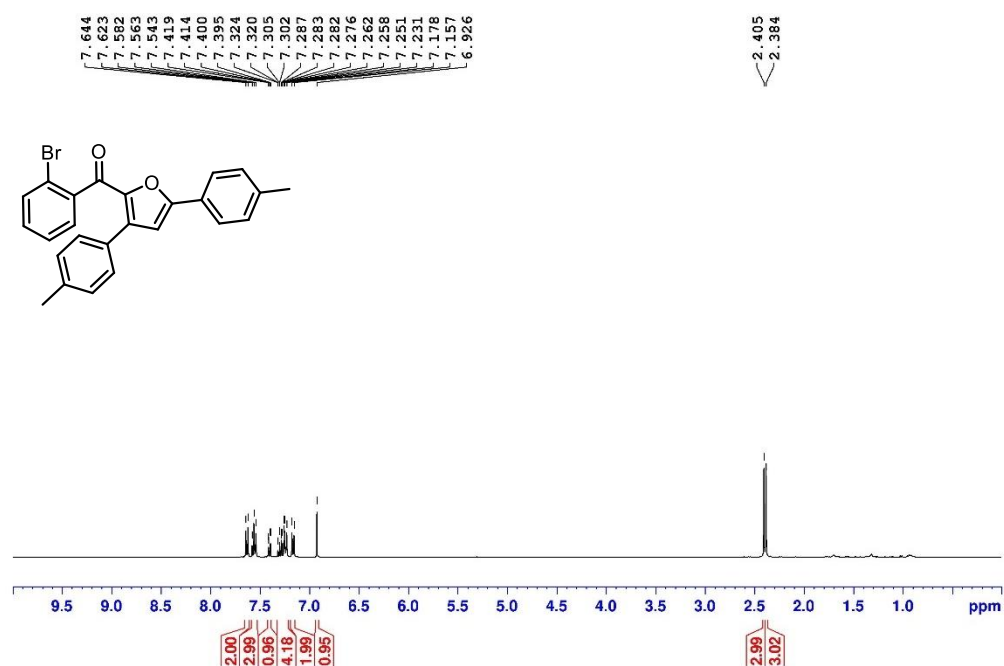

$^{13}\text{C}$  NMR spectrum of compound **2ac** (100 MHz,  $\text{CDCl}_3$ )

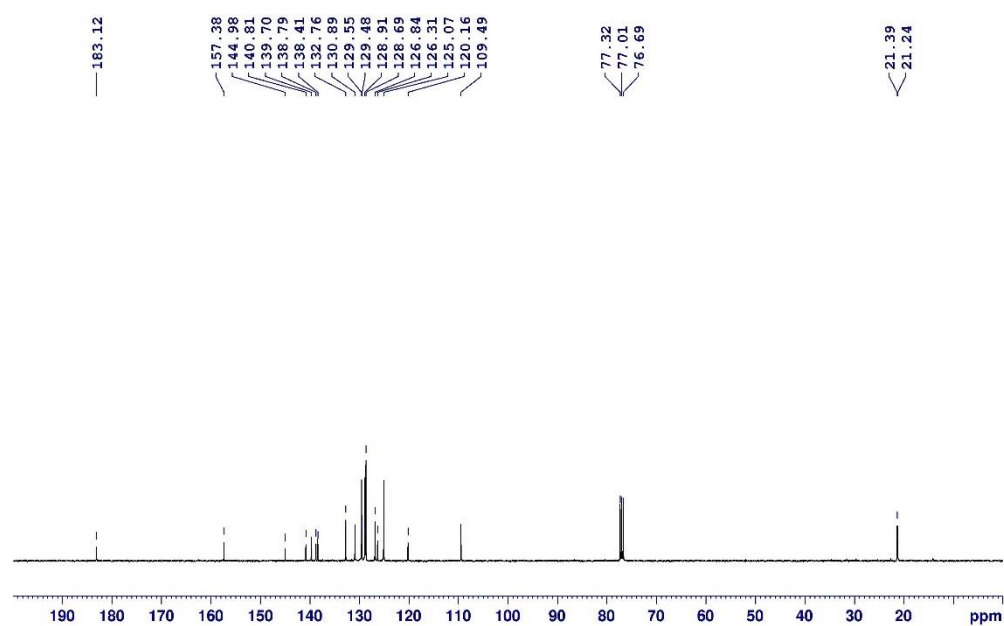

**Figure S4**  $^1\text{H}$  NMR spectrum of compound **2ad** (400 MHz,  $\text{CDCl}_3$ )

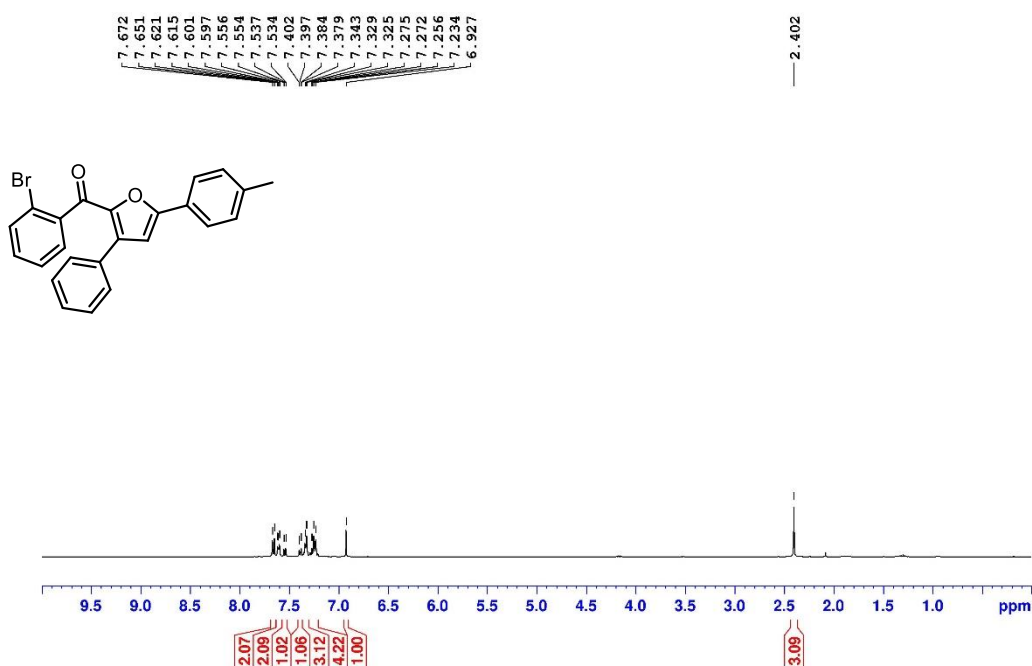

$^{13}\text{C}$  NMR spectrum of compound **2ad** (100 MHz,  $\text{CDCl}_3$ )

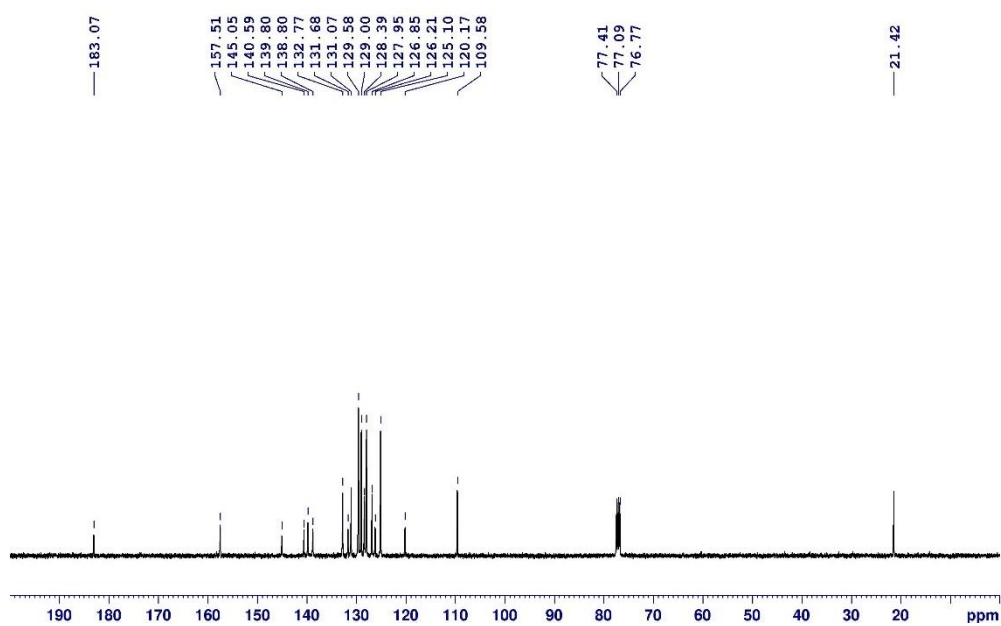

**Figure S5**  $^1\text{H}$  NMR spectrum of compound **2ae** (400 MHz,  $\text{CDCl}_3$ )

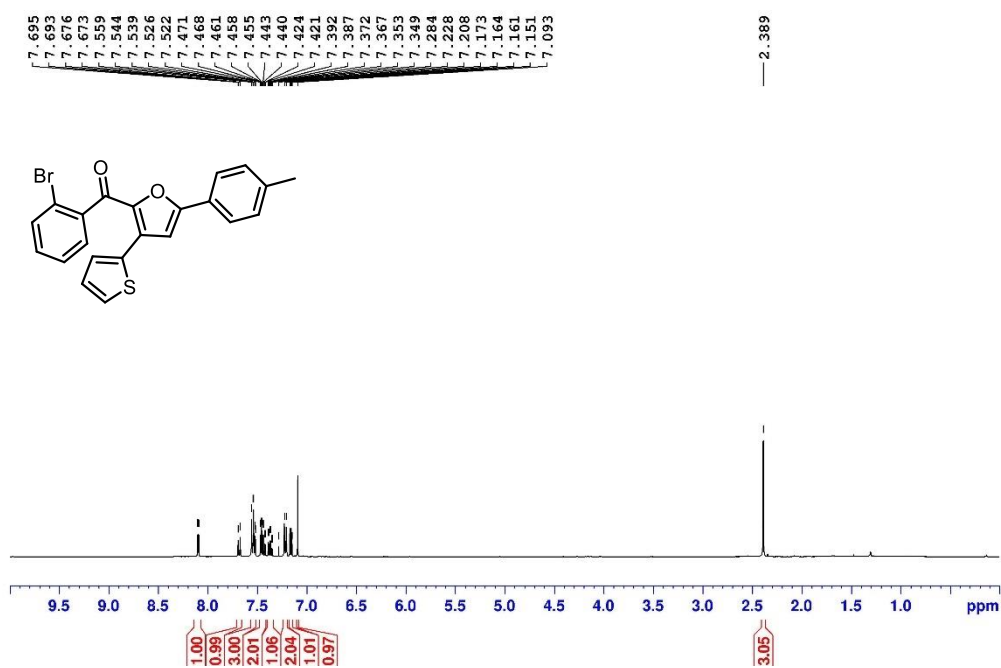

$^{13}\text{C}$  NMR spectrum of compound **2ae** (100 MHz,  $\text{CDCl}_3$ )

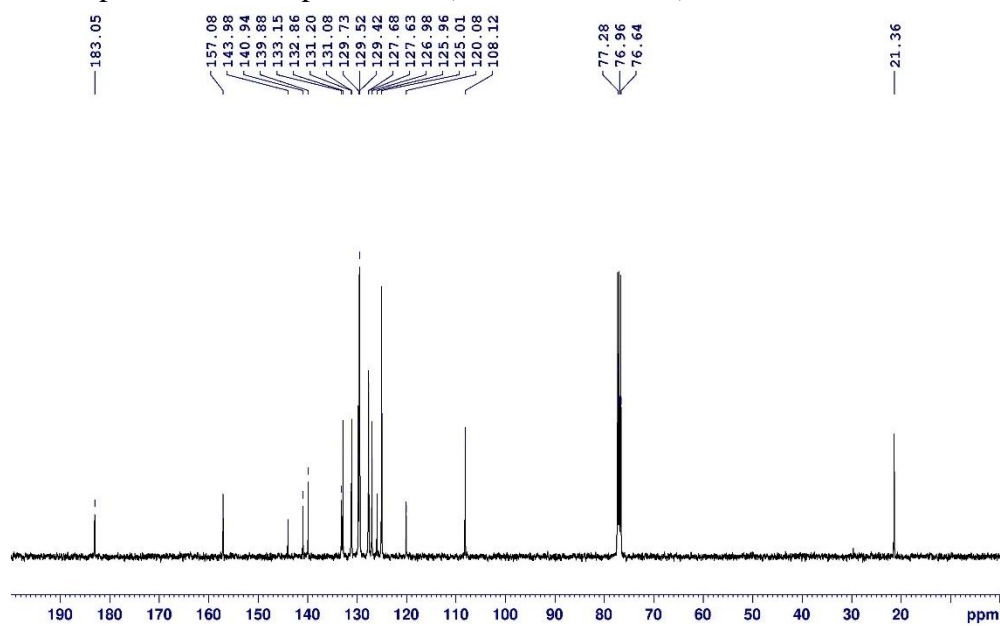

**Figure S6**  $^1\text{H}$  NMR spectrum of compound **2af** (400 MHz,  $\text{CDCl}_3$ )

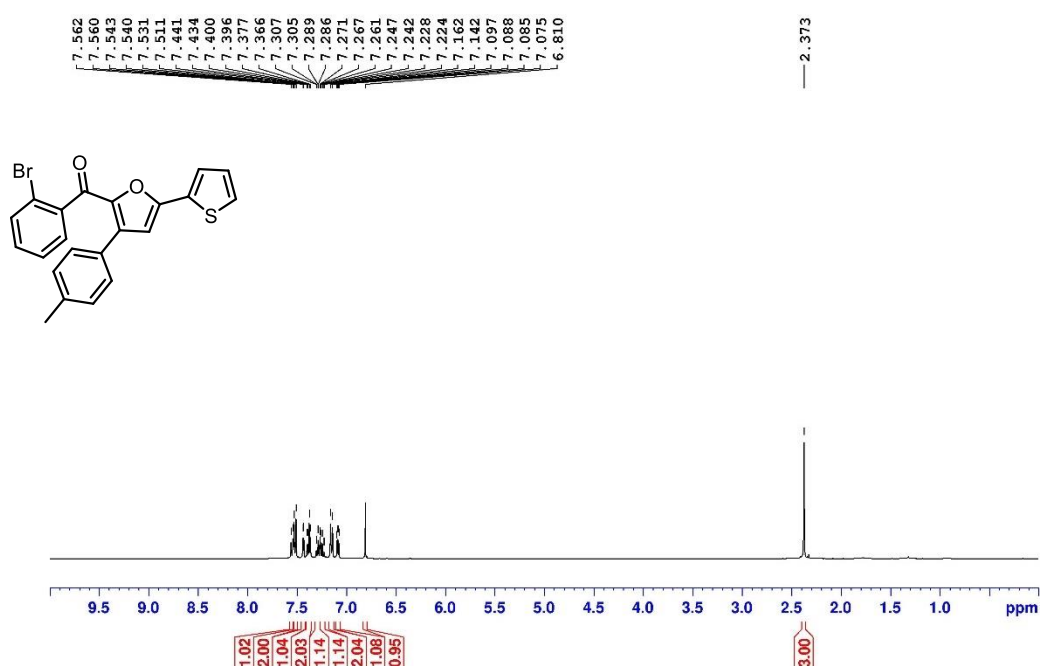

$^{13}\text{C}$  NMR spectrum of compound **2af** (100 MHz,  $\text{CDCl}_3$ )

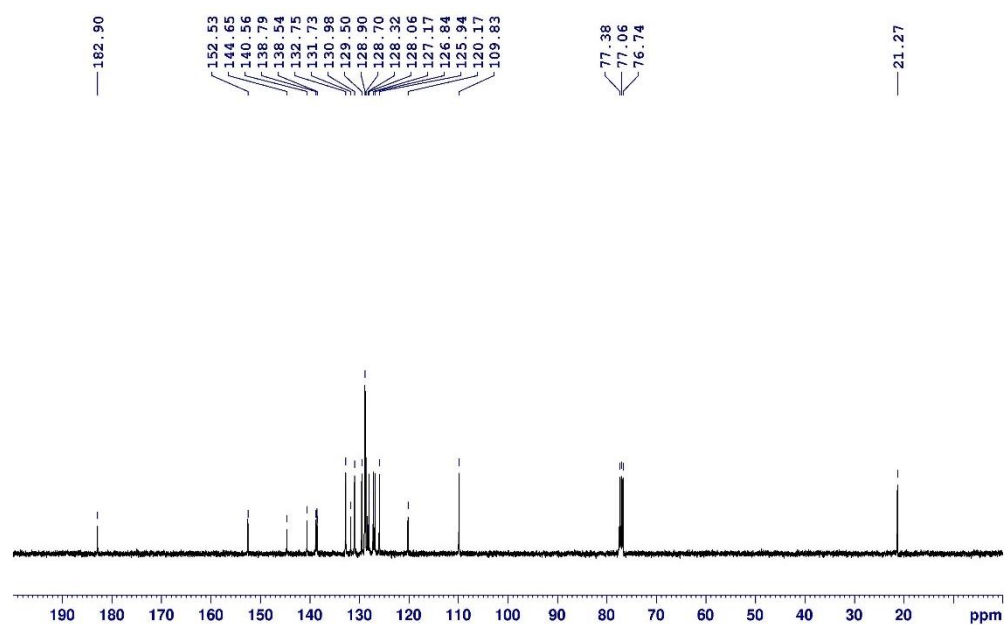

**Figure S7**  $^1\text{H}$  NMR spectrum of compound **2ag** (400 MHz,  $\text{CDCl}_3$ )

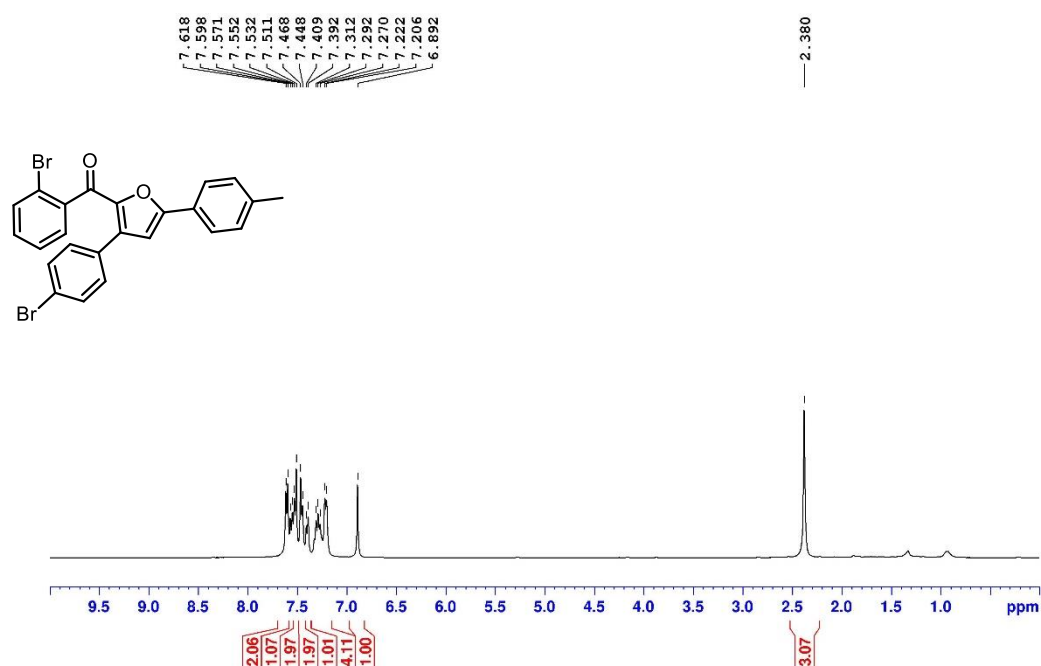

$^{13}\text{C}$  NMR spectrum of compound **2ag** (100 MHz,  $\text{CDCl}_3$ )

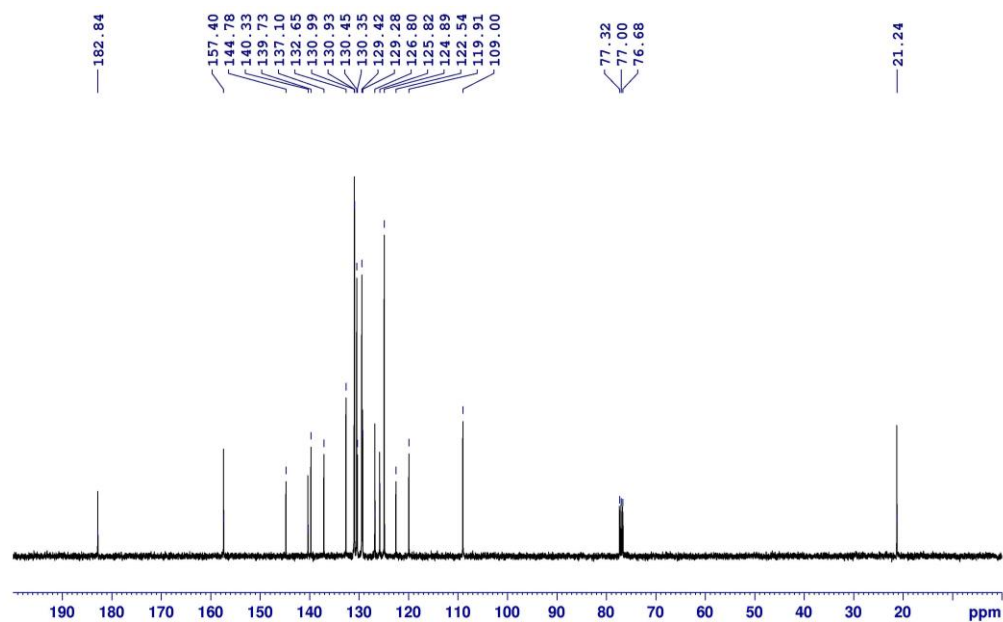

**Figure S8**  $^1\text{H}$  NMR spectrum of compound **2ba** (400 MHz,  $\text{CDCl}_3$ )

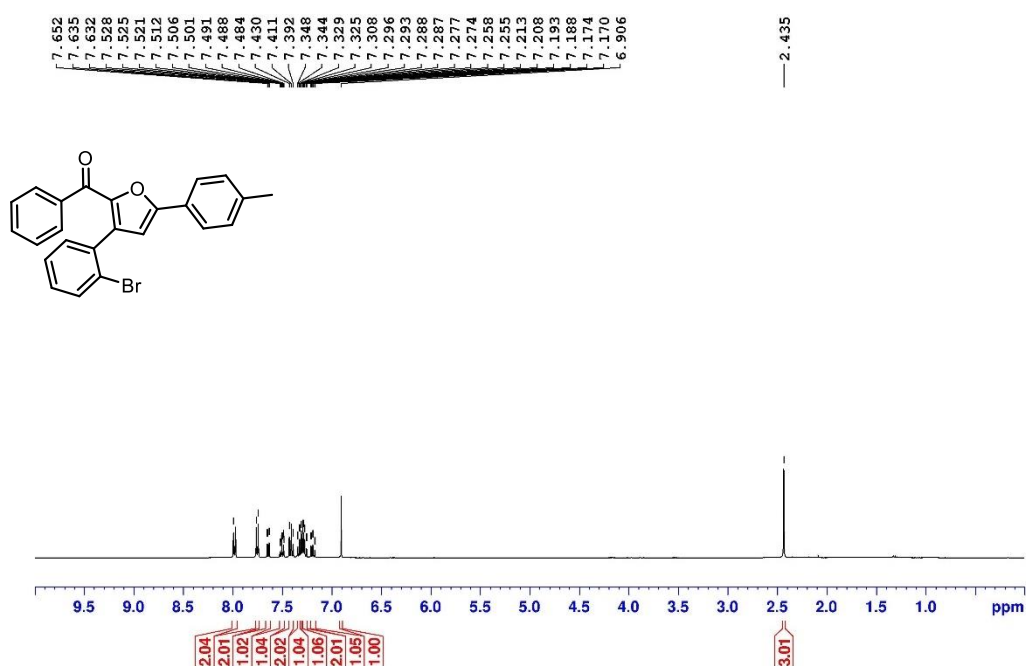

$^{13}\text{C}$  NMR spectrum of compound **2ba** (100 MHz,  $\text{CDCl}_3$ )

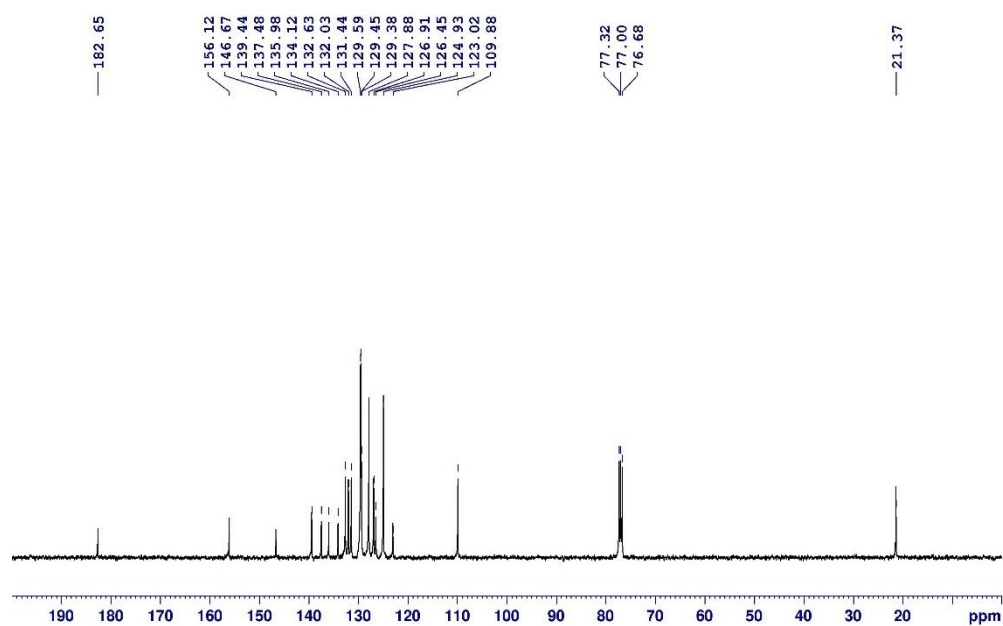

**Figure S9**  $^1\text{H}$  NMR spectrum of compound **2ca** (400 MHz,  $\text{CDCl}_3$ )

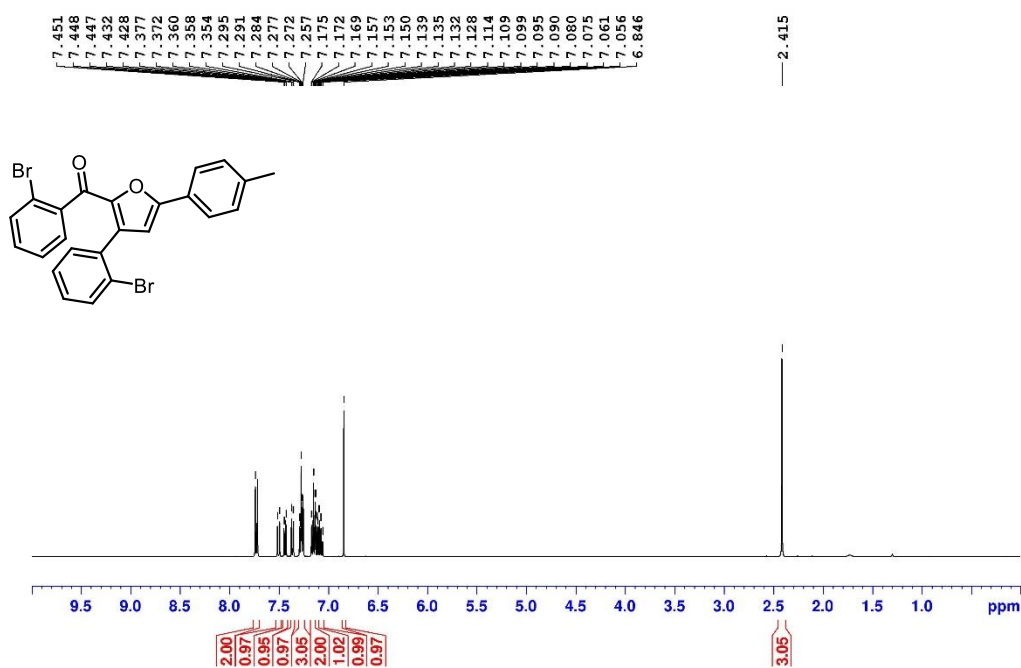

$^{13}\text{C}$  NMR spectrum of compound **2ca** (100 MHz,  $\text{CDCl}_3$ )

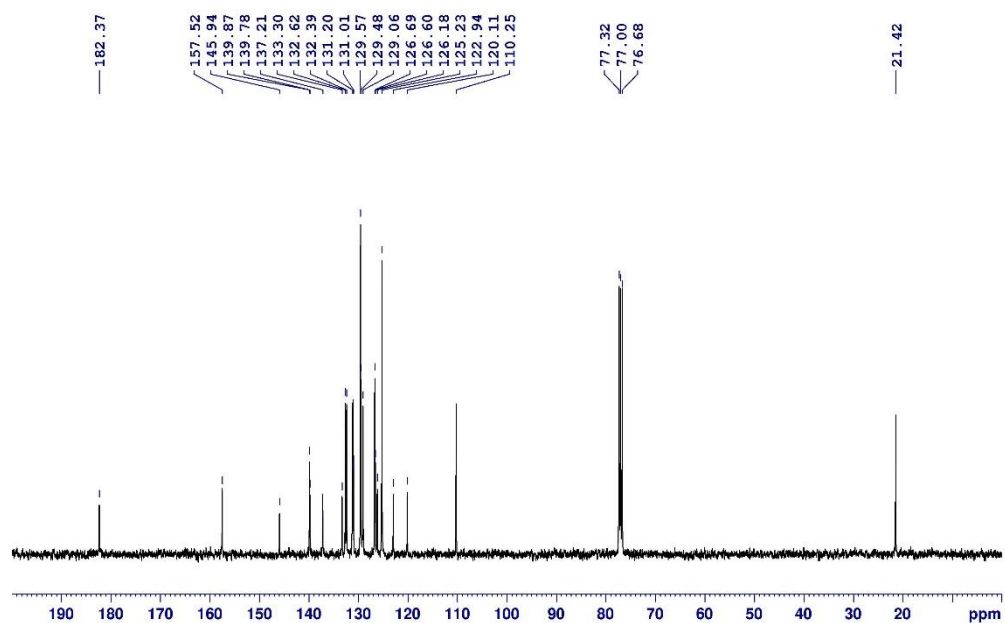



**Figure S10**  $^1\text{H}$  NMR spectrum of compound **2da** (400 MHz,  $\text{CDCl}_3$ )

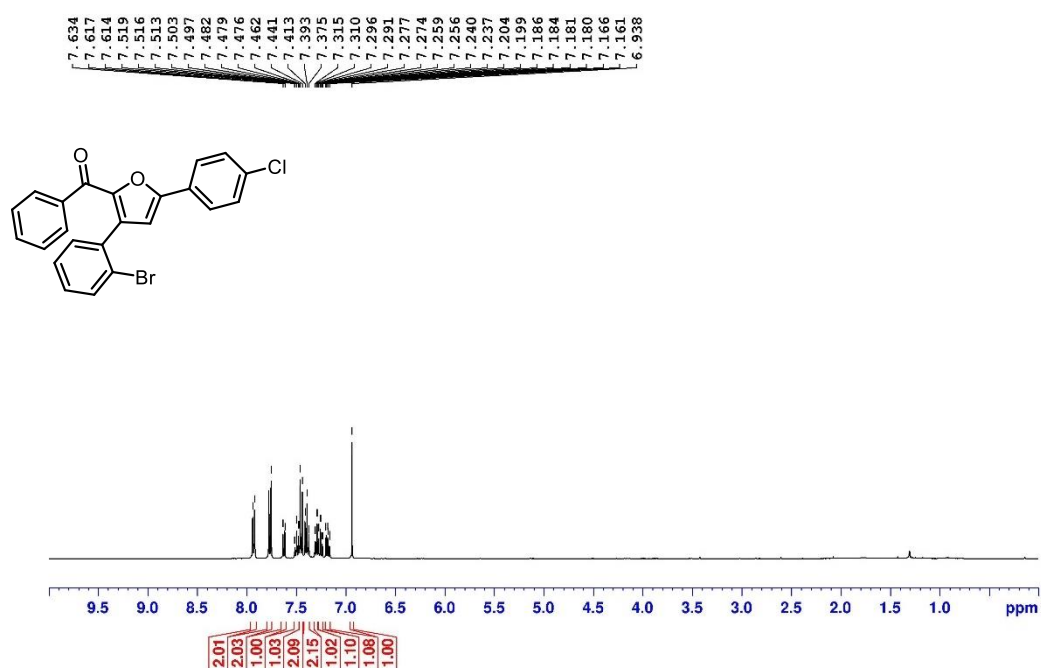

$^{13}\text{C}$  NMR spectrum of compound **2da** (100 MHz,  $\text{CDCl}_3$ )

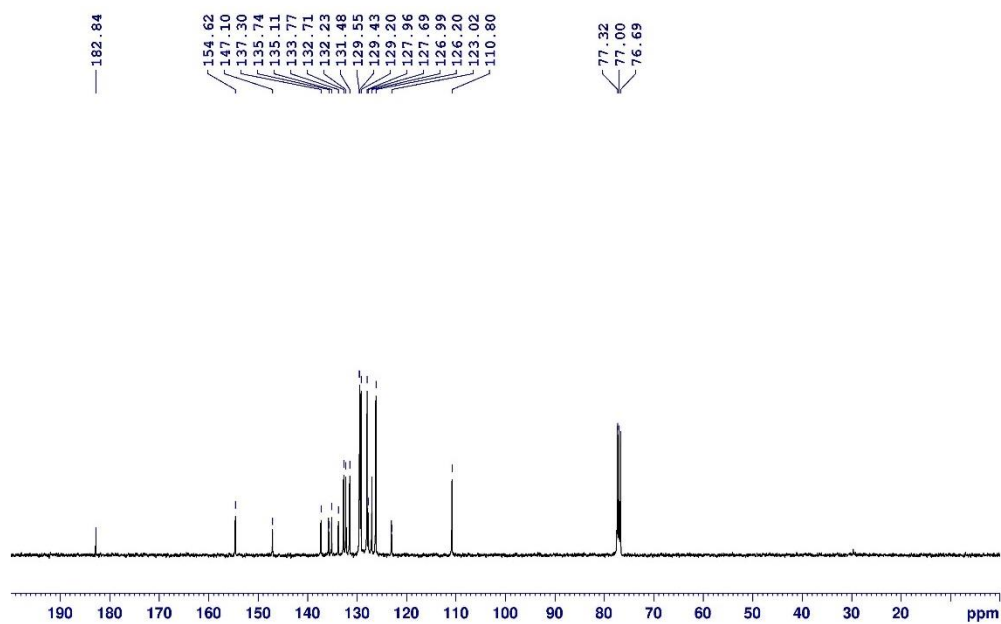

**Figure S11**  $^1\text{H}$  NMR spectrum of compound **2ea** (400 MHz,  $\text{CDCl}_3$ )

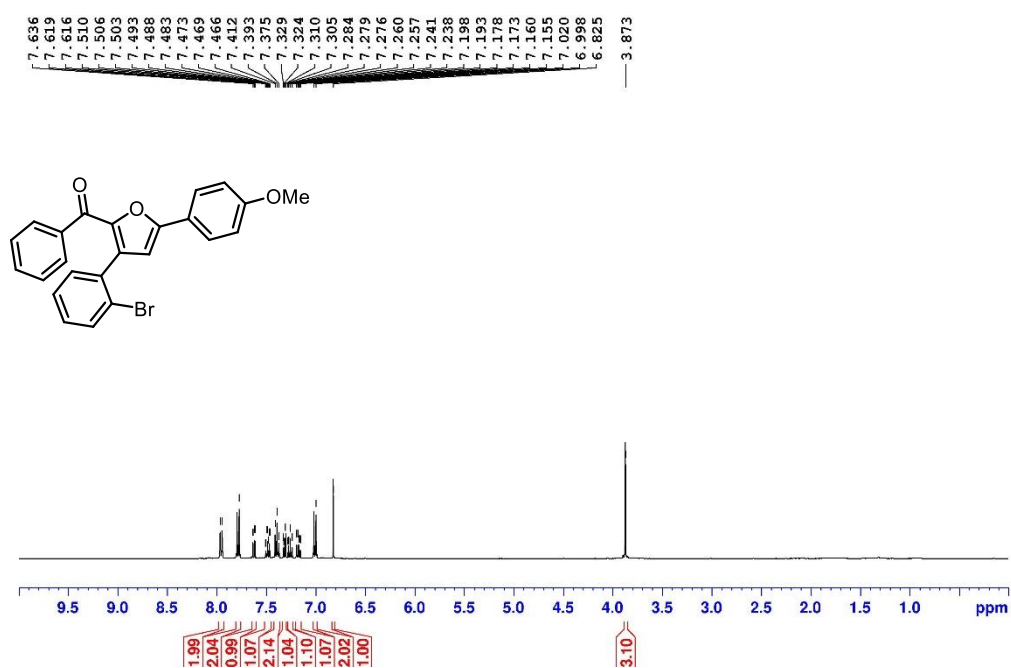

$^{13}\text{C}$  NMR spectrum of compound **2ea** (100 MHz,  $\text{CDCl}_3$ )

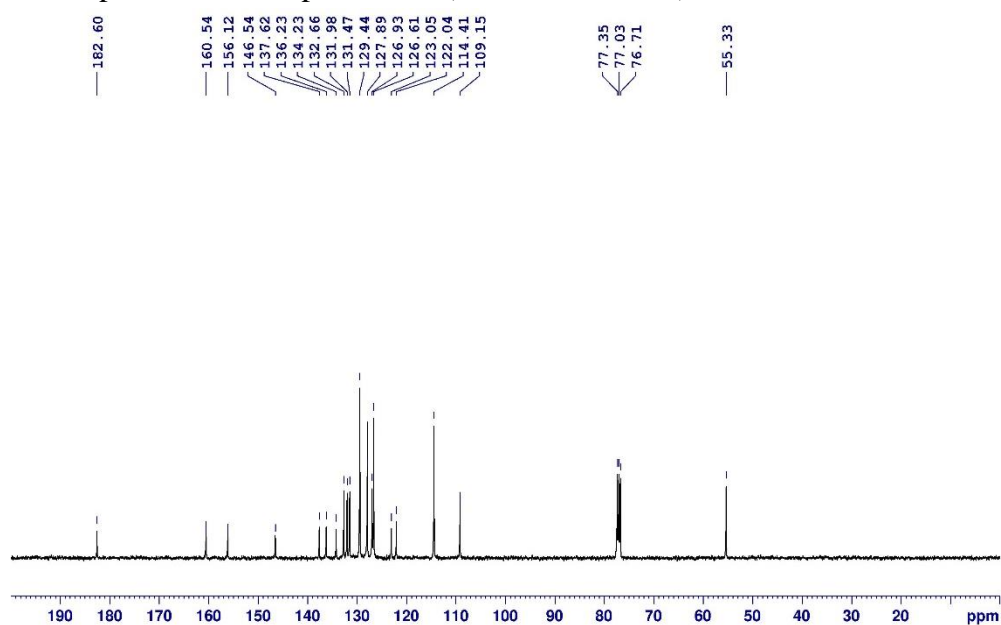

**Figure S12**  $^1\text{H}$  NMR spectrum of compound **2fa** (400 MHz,  $\text{CDCl}_3$ )

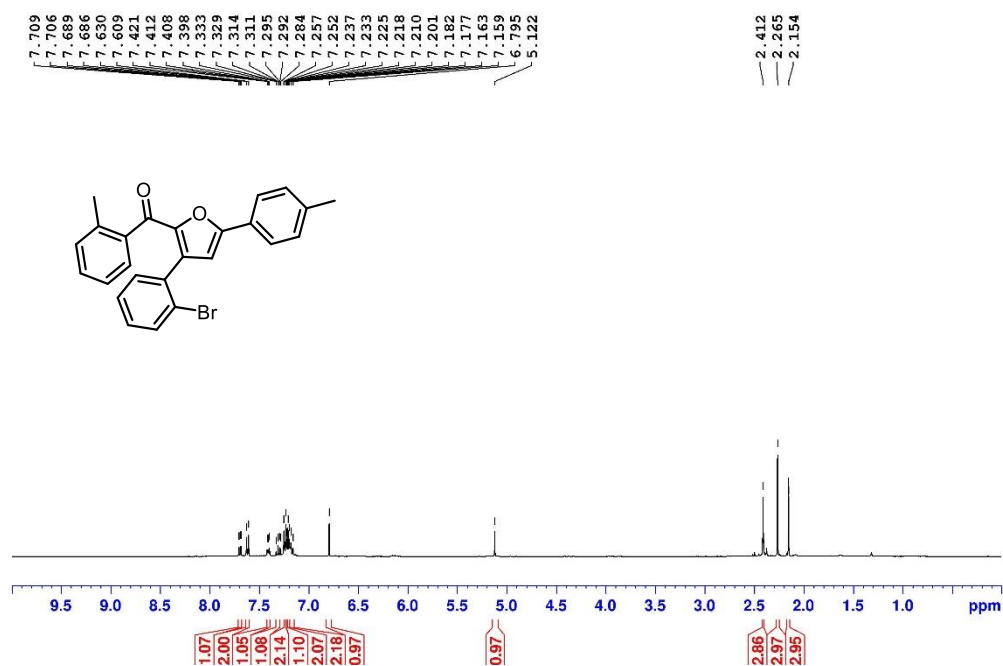

$^{13}\text{C}$  NMR spectrum of compound **2fa** (100 MHz,  $\text{CDCl}_3$ )

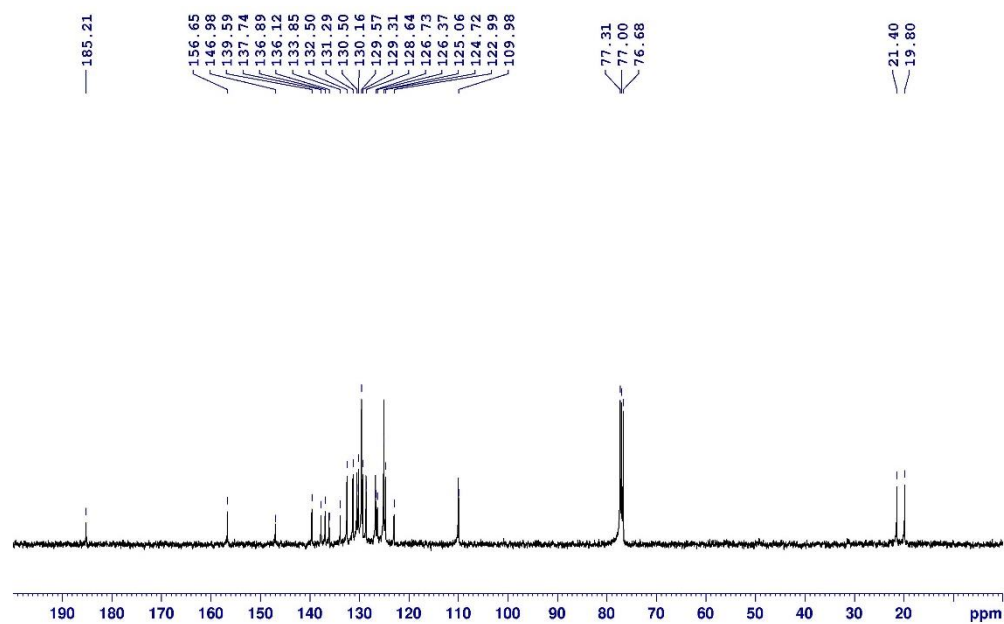

**Figure S13**  $^1\text{H}$  NMR spectrum of compound **2ga** (400 MHz,  $\text{CDCl}_3$ )

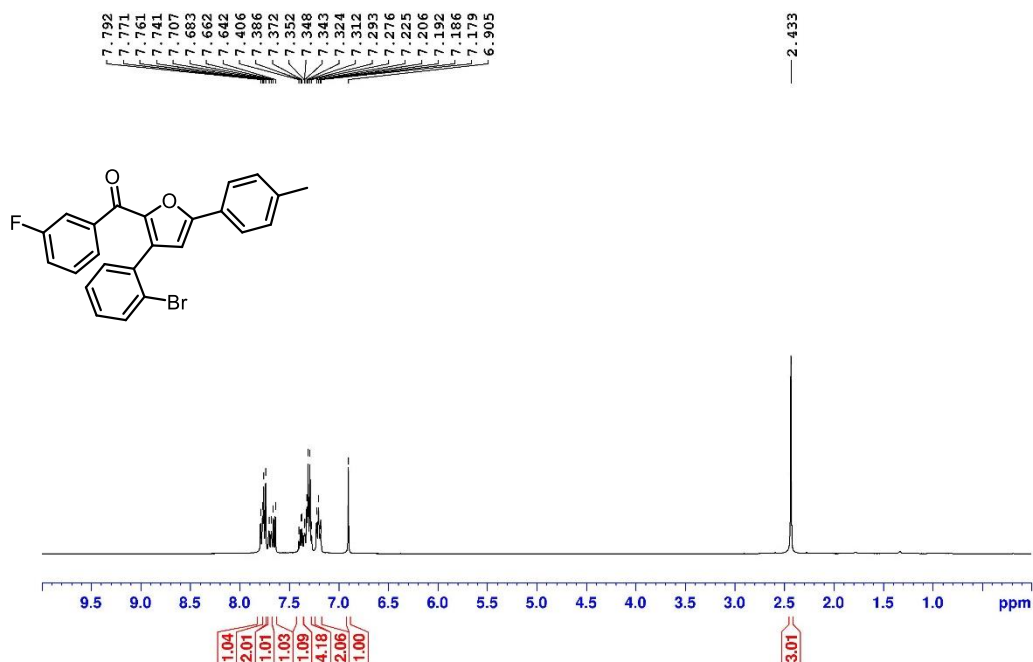

$^{13}\text{C}$  NMR spectrum of compound **2ga** (100 MHz,  $\text{CDCl}_3$ )

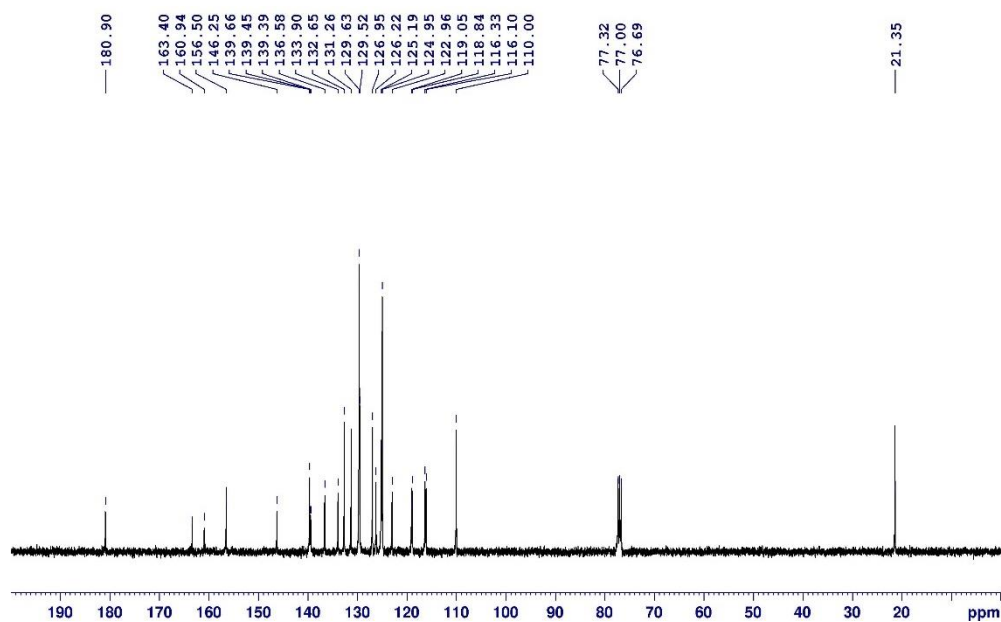

**Figure S14**  $^1\text{H}$  NMR spectrum of compound **1aa** (400 MHz,  $\text{CDCl}_3$ )

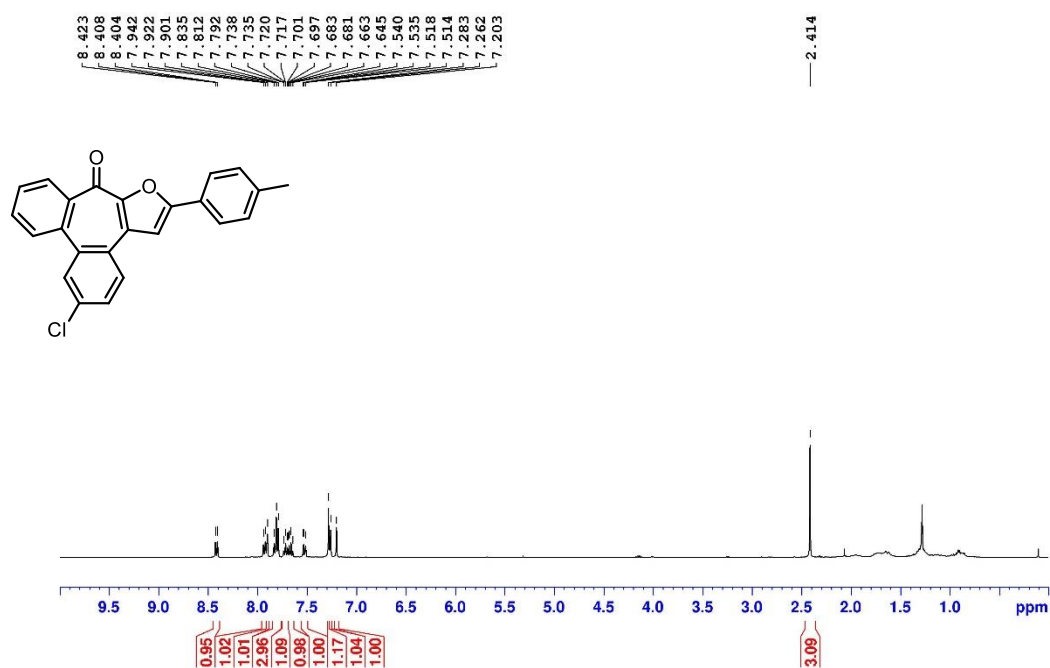

$^{13}\text{C}$  NMR spectrum of compound **1aa** (100 MHz,  $\text{CDCl}_3$ )

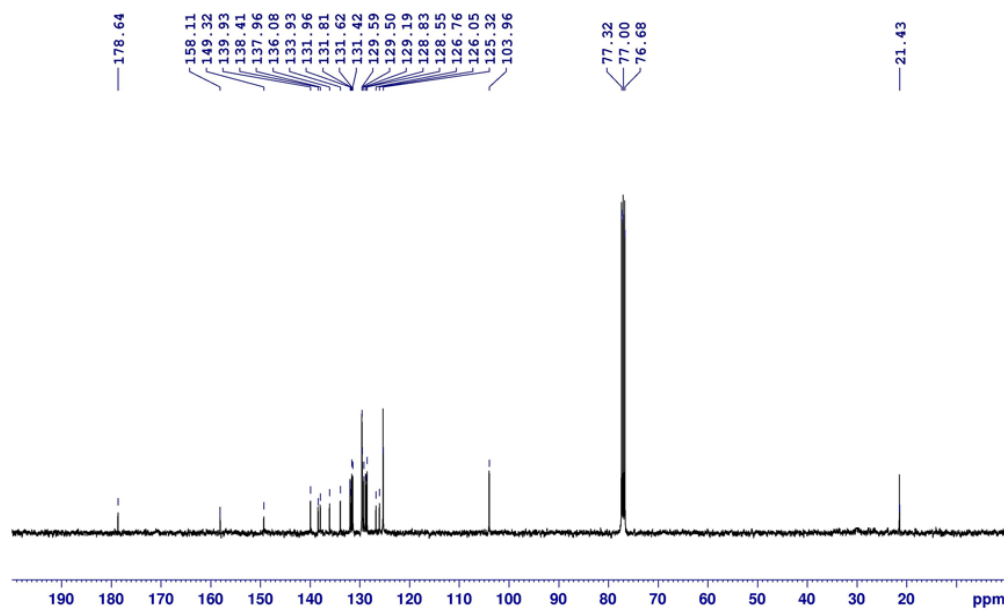

**Figure S15**  $^1\text{H}$  NMR spectrum of compound **1ab** (400 MHz,  $\text{CDCl}_3$ )

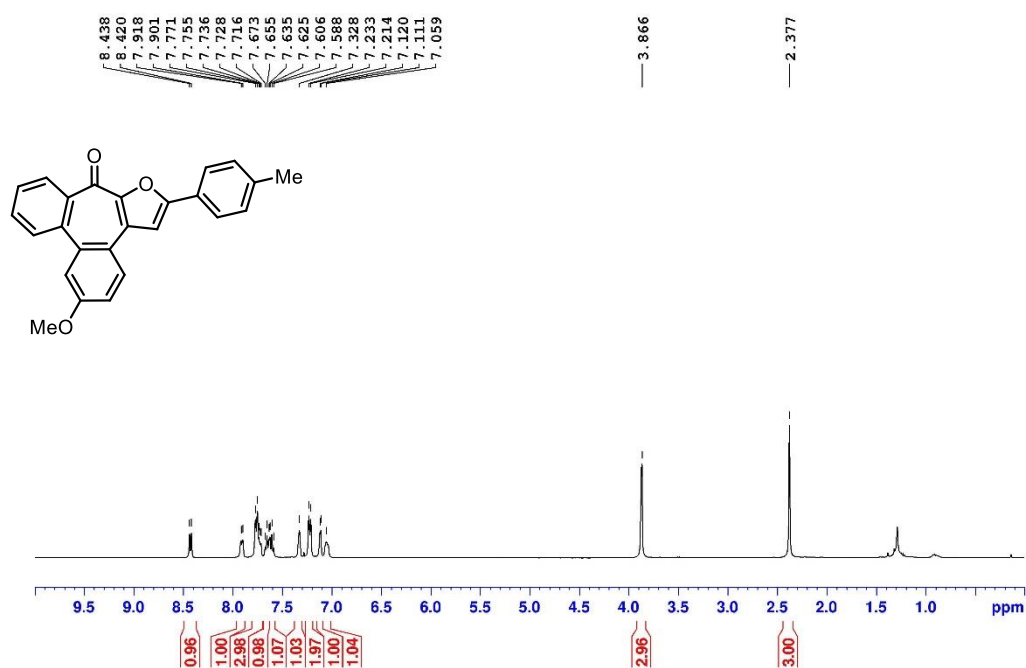

$^{13}\text{C}$  NMR spectrum of compound **1ab** (100 MHz,  $\text{CDCl}_3$ )

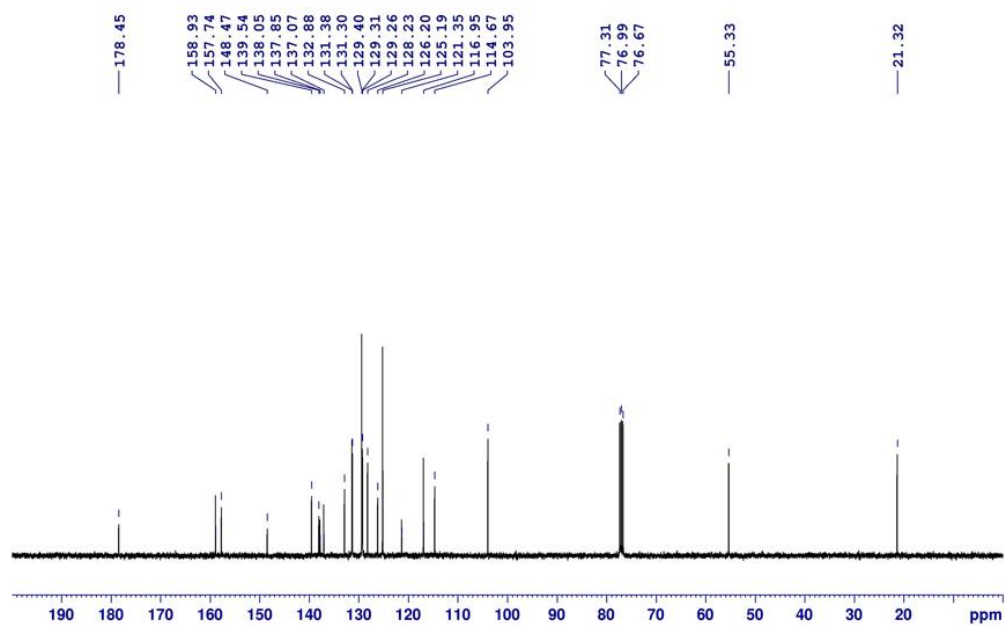

**Figure S16**  $^1\text{H}$  NMR spectrum of compound **1ac** (400 MHz,  $\text{CDCl}_3$ )

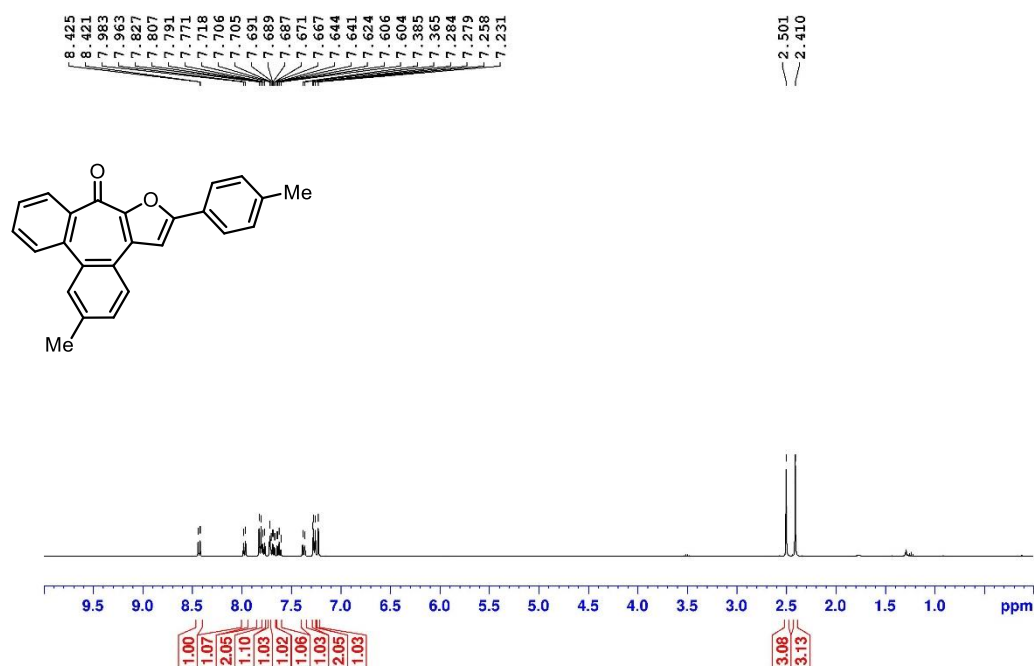

$^{13}\text{C}$  NMR spectrum of compound **1ac** (100 MHz,  $\text{CDCl}_3$ )

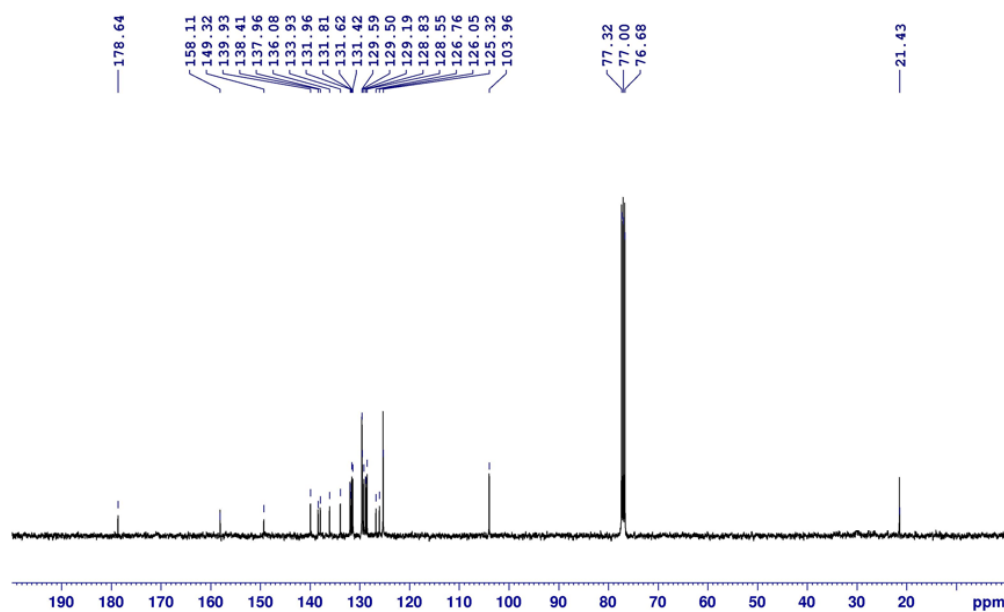

**Figure S17**  $^1\text{H}$  NMR spectrum of compound **1ad** (400 MHz,  $\text{CDCl}_3$ )

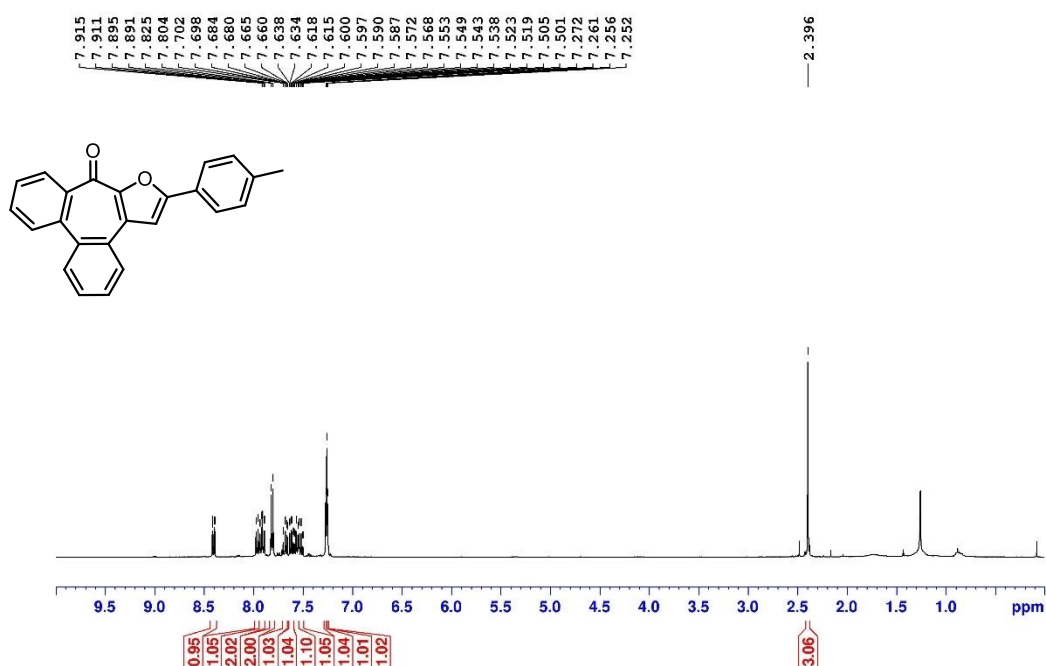

$^{13}\text{C}$  NMR spectrum of compound **1ad** (100 MHz,  $\text{CDCl}_3$ )

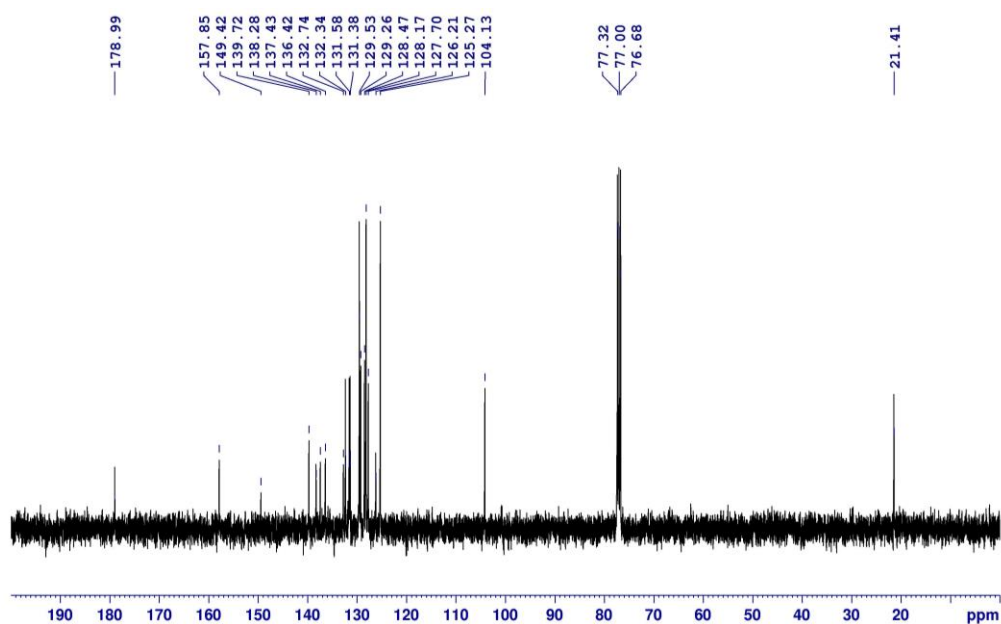



**Figure S18**  $^1\text{H}$  NMR spectrum of compound **1ae** (400 MHz,  $\text{CDCl}_3$ )

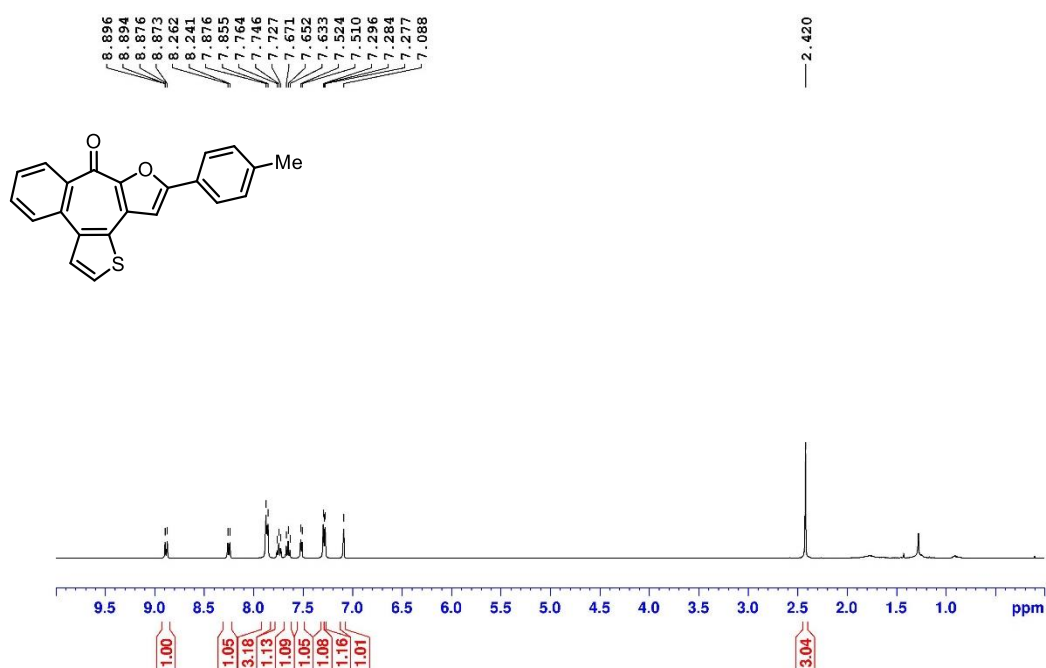

$^{13}\text{C}$  NMR spectrum of compound **1ae** (100 MHz,  $\text{CDCl}_3$ )

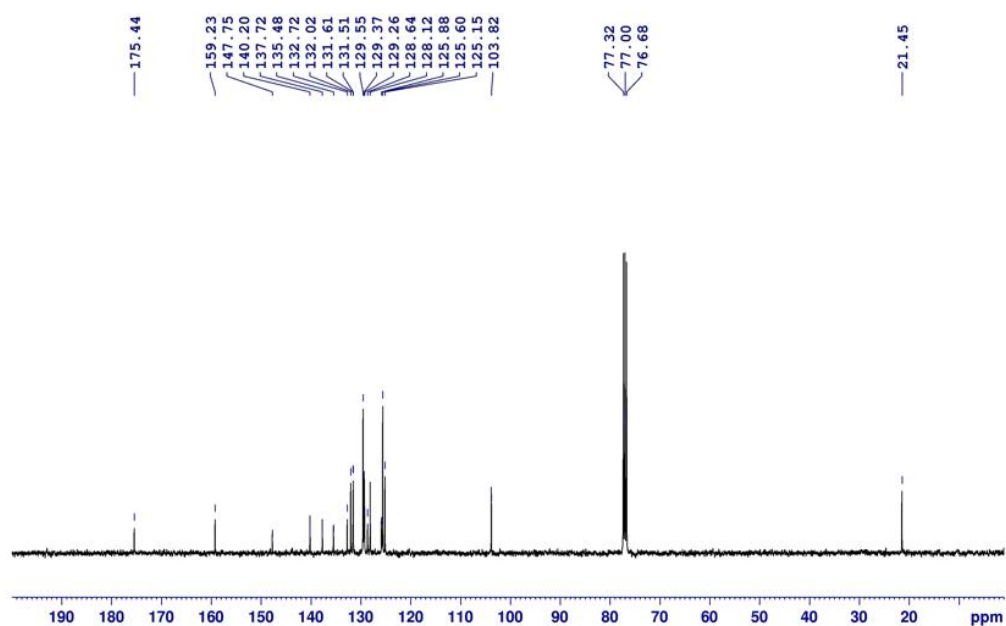

**Figure S19**  $^1\text{H}$  NMR spectrum of compound **1af** (400 MHz,  $\text{CDCl}_3$ )

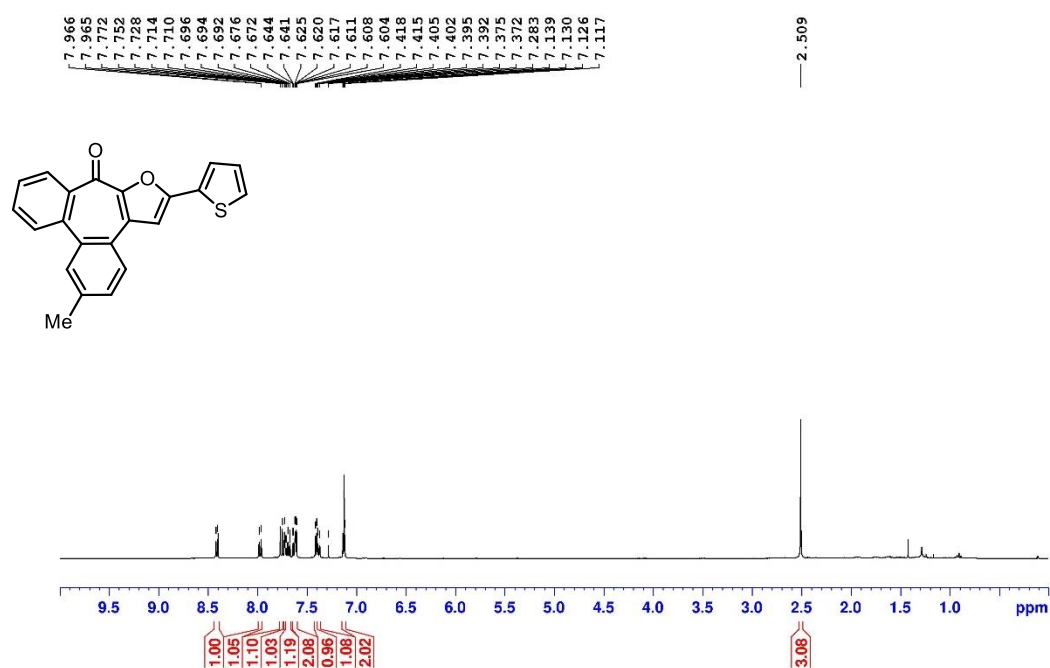

$^{13}\text{C}$  NMR spectrum of compound **1af** (100 MHz,  $\text{CDCl}_3$ )

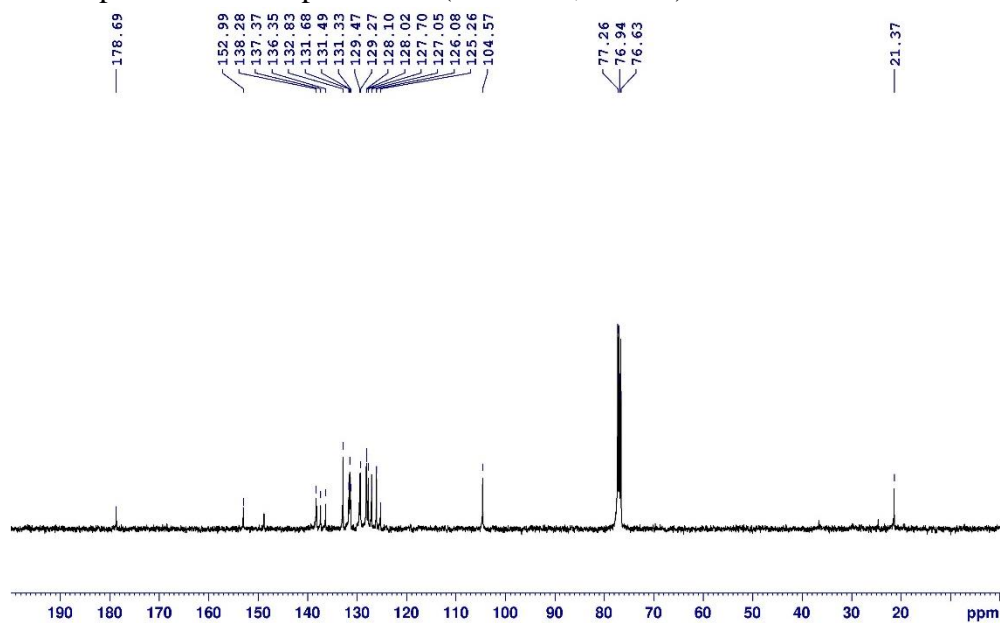

**Figure S20**  $^1\text{H}$  NMR spectrum of compound **1da** (400 MHz,  $\text{CDCl}_3$ )

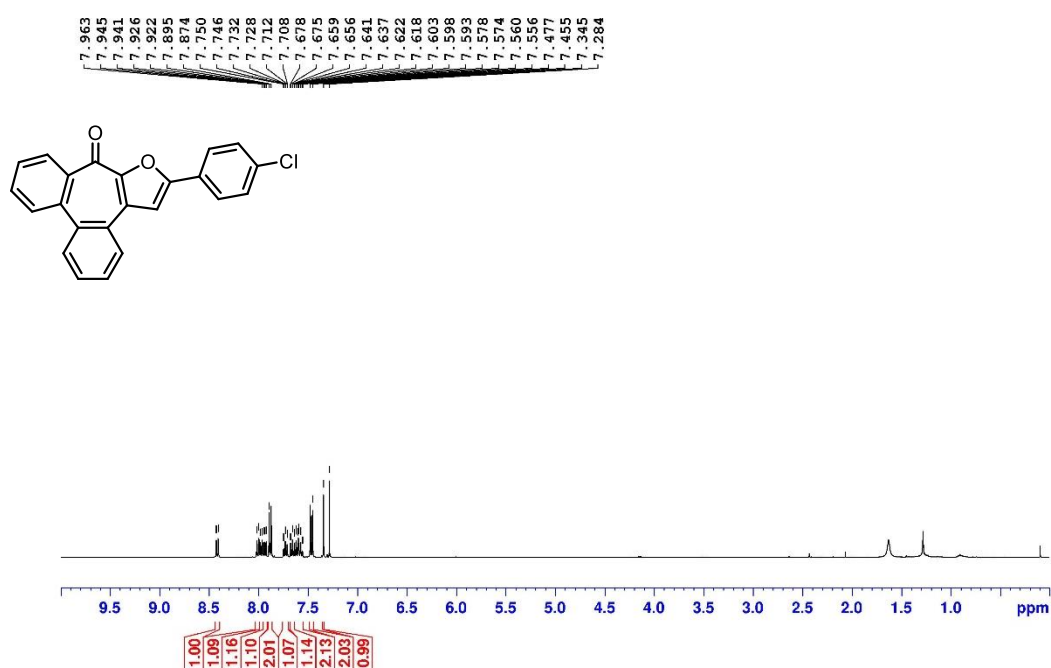

$^{13}\text{C}$  NMR spectrum of compound **1da** (100 MHz,  $\text{CDCl}_3$ )

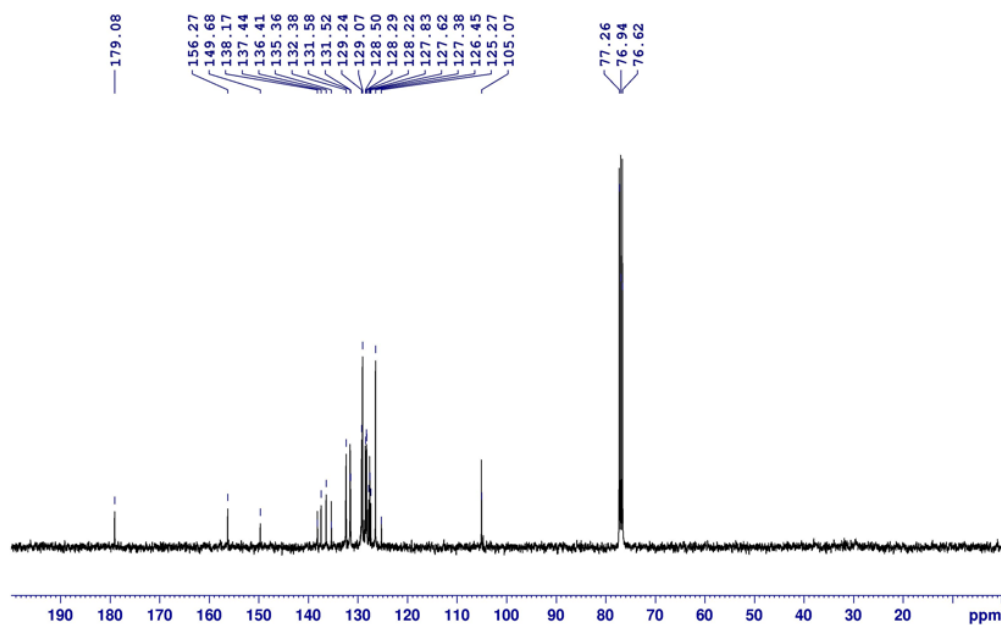

**Figure S21**  $^1\text{H}$  NMR spectrum of compound **1ea** (400 MHz,  $\text{CDCl}_3$ )

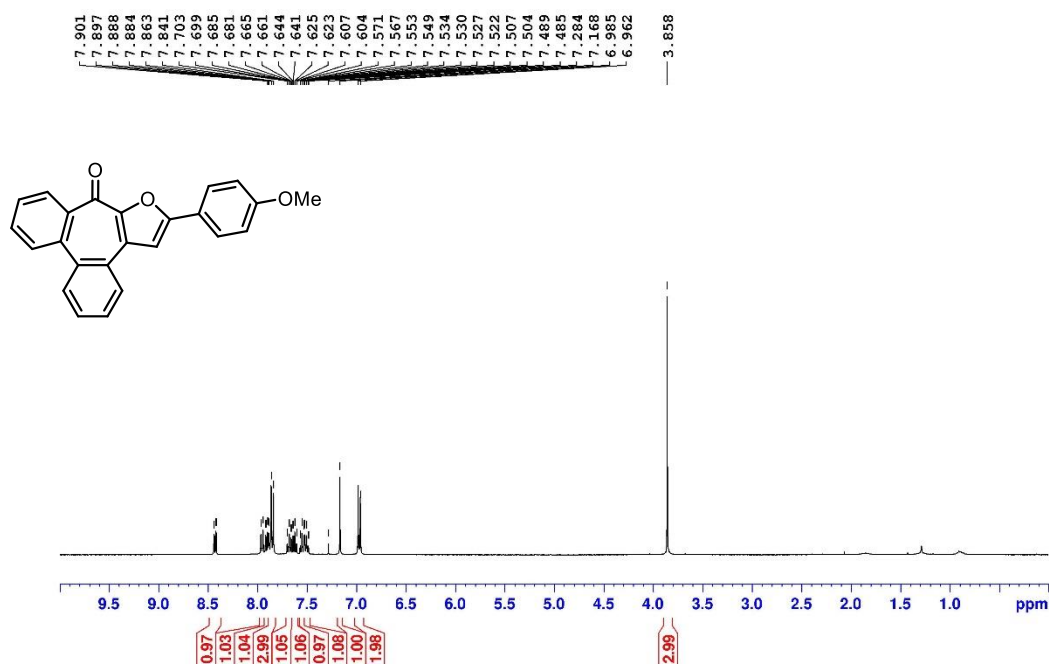

$^{13}\text{C}$  NMR spectrum of compound **1ea** (100 MHz,  $\text{CDCl}_3$ )

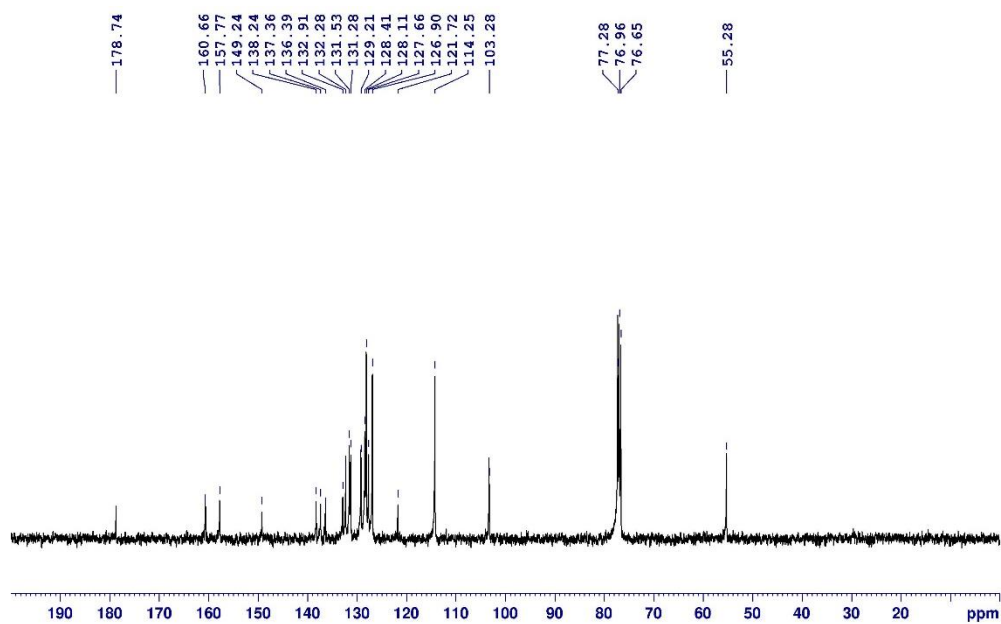

**Figure S22**  $^1\text{H}$  NMR spectrum of compound **1fa** (400 MHz,  $\text{CDCl}_3$ )

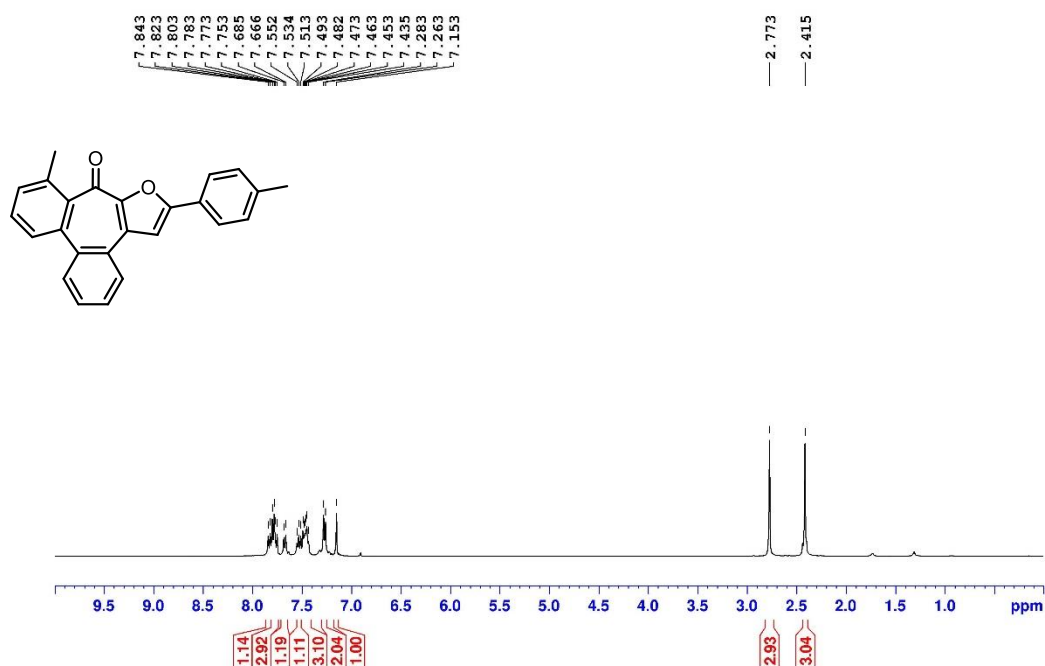

$^{13}\text{C}$  NMR spectrum of compound **1fa** (100 MHz,  $\text{CDCl}_3$ )

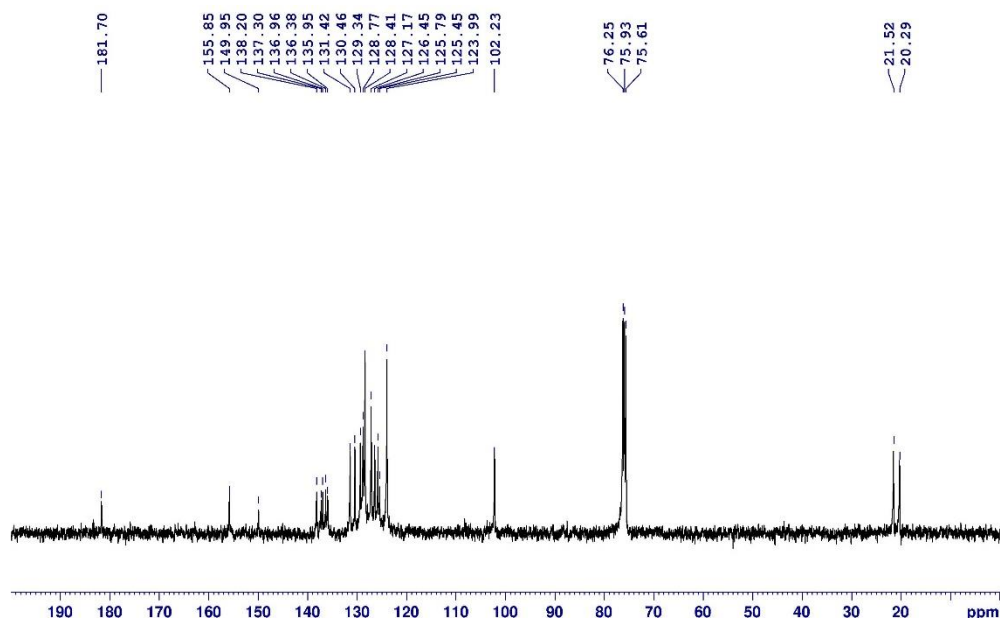

**Figure S23**  $^1\text{H}$  NMR spectrum of compound **1ga** (400 MHz,  $\text{CDCl}_3$ )

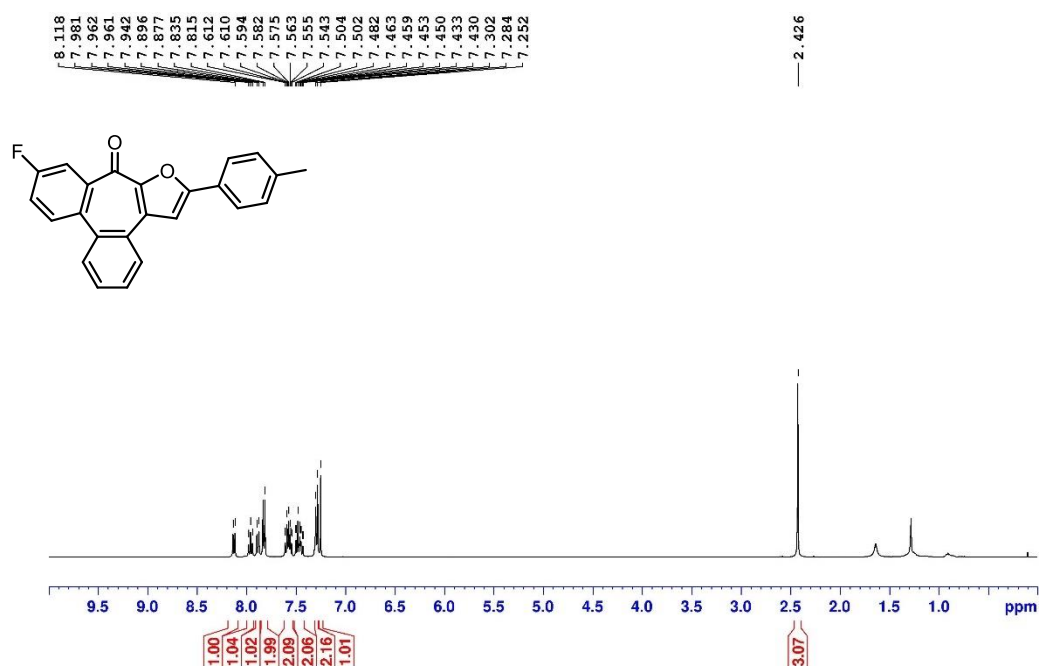

$^{13}\text{C}$  NMR spectrum of compound **1ga** (100 MHz,  $\text{CDCl}_3$ )

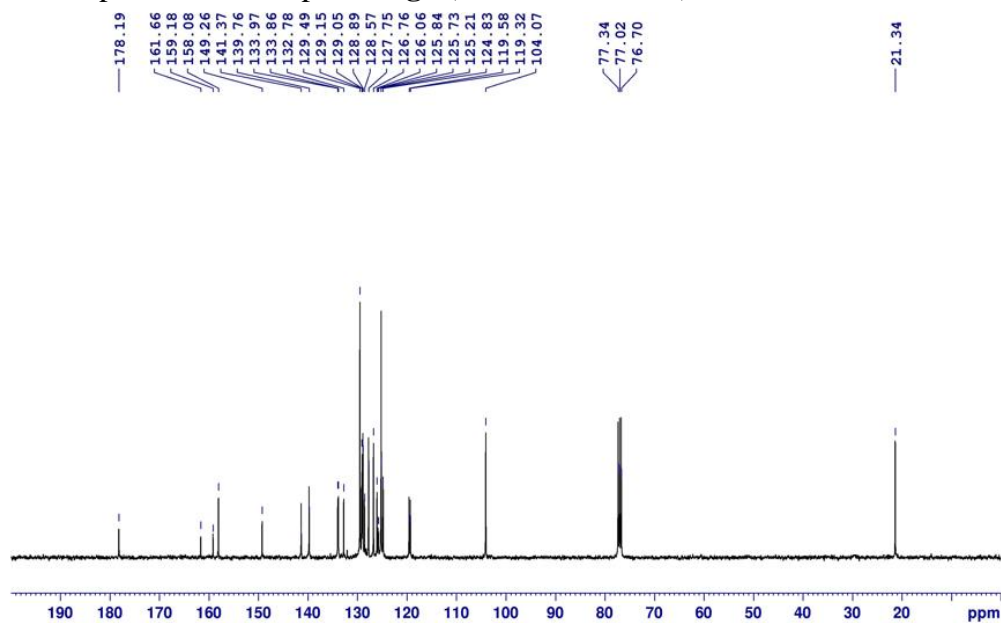

Supplement: s1 [file s1]
